# Supplementary material for: Enantioselective regiospecific addition of propargyltrichlorosilane to aldehydes catalyzed by biisoquinoline N,N’-dioxide
Source: PubMed Central journal article supplement (PMC11610484; doi:10.3762/bjoc.20.255), 2024-11-25

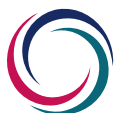

## Supporting Information

for

### **Enantioselective regiospecific addition of propargyltrichlorosilane to aldehydes catalyzed by bisoquinoline *N,N'*-dioxide**

Noble Brako, Sreerag Moorkkannur Narayanan, Amber Burns, Layla Auter, Valentino Cesiliano, Rajeev Prabhakar and Norito Takenaka

*Beilstein J. Org. Chem.* **2024**, *20*, 3069–3076. [doi:10.3762/bjoc.20.255](https://doi.org/10.3762/bjoc.20.255)

### **Experimental details, characterization data, spectra, and HPLC traces**

## Table of contents

|                                                            |     |
|------------------------------------------------------------|-----|
| 1. General information .....                               | S1  |
| 2. Experimental procedures .....                           | S2  |
| 3. Computations .....                                      | S10 |
| 4. References .....                                        | S10 |
| 5. <sup>1</sup> H NMR Spectra .....                        | S12 |
| 6. HPLC traces for enantiomeric excess determination ..... | S24 |

### 1. General Information

All reactions were carried out in oven- or flame-dried glassware under an atmosphere of dry argon or nitrogen unless otherwise noted. Except as otherwise indicated, all reactions were magnetically stirred and monitored by analytical thin-layer chromatography using EMD Millipore pre-coated silica gel plates with F<sub>254</sub> indicator. Visualization was accomplished by UV light (254 nm), with a combination of potassium permanganate, *p*-anisaldehyde, and/or cerium molybdate solution as an indicator. Chiral HPLC analysis was performed on Varian Polaris HPLC system with a diode array detector using analytical chiral columns (250 × 4.6 mm, L × I.D.) purchased from CHIRAL TECHNOLOGIES, INC. (CHIRALCEL<sup>®</sup> OD-H, CHIRALPAK<sup>®</sup> AD-H, and CHIRALPAK<sup>®</sup> AS-H). Flash column chromatography was performed according to the method of Still [1] using silica gel 60 (mesh 230–400) supplied by SiliCycle<sup>®</sup> Inc. Isolated yields refer to chromatographically and spectroscopically pure compounds, unless otherwise stated.

Commercial grade reagents and solvents were purchased from Sigma-Aldrich, Alfa-Aesar, Acros, Fisher, TCI, and VWR, and were used as received without further purification except as indicated below. Aldehydes were freshly distilled over CaH<sub>2</sub> in vacuo prior to use. Et<sub>2</sub>O was freshly distilled over sodium/benzophenone under an atmosphere of dry nitrogen prior to use. CH<sub>2</sub>Cl<sub>2</sub> was freshly distilled over CaH<sub>2</sub> under an atmosphere of dry nitrogen prior to use. *N,N*-Diisopropylethylamine was distilled over KOH under an atmosphere of dry nitrogen, stored over NaOH in a Schlenk flask, and used from there.

All  $^1\text{H}$  NMR and  $^{13}\text{C}$  NMR spectra were obtained using a Bruker 400 Ultrashield or an Oxford AS400 Spectrometer ( $^1\text{H}$  400 MHz,  $^{13}\text{C}$  100 MHz) at ambient temperature in  $\text{CDCl}_3$  purchased from Cambridge Isotope Laboratories, Inc. Chemical shifts in  $^1\text{H}$  NMR spectra are reported in parts per million (ppm) respective to tetramethylsilane ( $\delta$  0.00 ppm) unless otherwise noted. The proton spectra are reported as follows  $\delta$  (multiplicity, coupling constant  $J$ , number of protons). Multiplicities are indicated by s (singlet), d (doublet), t (triplet), q (quartet), m (multiplet), and br (broad). Chemical shifts in  $^{13}\text{C}$  NMR spectra are reported in ppm respective to  $\text{CDCl}_3$  ( $\delta$  77.0 ppm). All  $^{13}\text{C}$  NMR spectra were recorded with complete proton decoupling. HRMS data were obtained at USF Mass Spec and Peptide Core Facility in Department of Chemistry at University of South Florida. Optical rotations were measured using a Jasco P2000 Polarimeter at 589 nm and were reported as  $[\alpha]_D^{T\text{ }^\circ\text{C}}$ , where  $C$  is reported in g/100 mL.

## 2. Experimental procedures

### 2.1. Synthesis and distillation of propargyltrichlorosilane

A 500 mL Schlenk round-bottomed flask equipped with a 60 mL addition funnel was charged with  $\text{CuF}_2$  (254 mg, 2.5 mmol), freshly distilled  $\text{Et}_2\text{O}$  (80 mL), propargyl bromide (3.8 mL, 50.0 mmol), and  $N,N$ -diisopropylethylamine (17.5 mL, 100.0 mmol). The resulting mixture was cooled to 0  $^\circ\text{C}$  in an ice bath, and then treated dropwise with a solution of  $\text{HSiCl}_3$  (11.1 mL, 110.0 mmol) in freshly distilled  $\text{Et}_2\text{O}$  (20 mL) through the addition funnel. The reaction mixture was stirred at room temperature for 12 h.

To this stirring mixture was added freshly distilled  $\text{CH}_2\text{Cl}_2$  (3.2 mL, 50.0 mmol) as an internal standard for  $^1\text{H}$  NMR analysis. Magnetic stirring was stopped to allow all solids to settle down at the bottom of the reaction flask. A small aliquot of the supernatant was transferred to a flame-dried NMR tube with a septum by a gas-tight syringe and diluted with anhydrous  $\text{CDCl}_3$  (ca. 0.7 mL) that was dried over activated 4  $\text{\AA}$  molecular sieves. The  $^1\text{H}$  NMR analysis of the reaction mixture indicated that 21.5 mmol of propargyltrichlorosilane (43% yield) formed and 4.8 mmol of  $N,N$ -diisopropylethylamine remained in the solution. There were no signs of allenyltrichlorosilane and propargyl bromide observable by  $^1\text{H}$  NMR in the reaction mixture.

The reaction mixture was treated with a solution of HCl in Et<sub>2</sub>O (1.0 M, 4.8 mL) and stirred for 5 min at room temperature. Magnetic stirring was stopped to allow all solids to settle down at the bottom of the reaction flask, and a small aliquot of the supernatant was analyzed by <sup>1</sup>H NMR in the same manner as above. The analysis confirmed that there was no *N,N*-diisopropylethylamine present in the reaction mixture, and no loss of propargyltrichlorosilane. The reaction mixture was filtered into another 500 mL Schlenk round-bottomed flask through a filter tube containing a short pad of oven-dried Celite<sup>®</sup>. The resulting clear solution was fractionally distilled as following. A short path distillation head with a 500 mL receiving flask was attached to the Schlenk flask containing the filtrate. Then, the Schlenk flask was immersed in an oil bath at 28 °C and the receiving flask was immersed in liquid nitrogen. Et<sub>2</sub>O and other volatiles were distilled by gradually increasing the vacuum from 150 to 10 mmHg till bubbling was no longer seen at the bottom of the Schlenk flask. Then, the vacuum was released by dry nitrogen gas. The 500 mL receiving flask containing volatile distillates was replaced with a 50 mL receiving flask under an atmosphere of dry nitrogen. Propargyltrichlorosilane was then distilled into the 50 mL receiving flask immersed in liquid nitrogen in vacuo (0.5 mmHg) to give clear liquid (0.93 g, 25%). Propargyltrichlorosilane:allenyltrichlorosilane = 200:1 by <sup>1</sup>H NMR. Propargyltrichlorosilane (0.93 g, 5.4 mmol) was diluted with freshly distilled CH<sub>2</sub>Cl<sub>2</sub> up to the total volume of 3.6 mL (1.5 M solution), transferred to a 10 mL Schlenk flask, and used from there. For storage, we put the 10 mL Schlenk flask in a Mason jar containing a small amount of indicating Drierite and stored the jar in the regular freezer (ca. -20 °C) to minimize the evaporation of CH<sub>2</sub>Cl<sub>2</sub>. So far, we have used the propargyltrichlorosilane solution in allenylation reactions up to four months without any noticeable changes. All spectral data were identical to literature values [2]. <sup>1</sup>H NMR (CDCl<sub>3</sub>): δ 2.42 (d, *J* = 2.8 Hz, 2H), 2.11 (t, *J* = 2.8 Hz, 1H).

## 2.2. Synthesis of catalysts 3–8

(*S*)-3,3'-Dimethyl-2,2'-biquinoline *N,N'*-dioxide (**3**) and (*S*)-1,1'-biisoquinoline *N,N'*-dioxide (**8**) were prepared by following the procedures reported by Nakajima [3]. (*S*)-3,3'-Bis(4-methylphenyl)-1,1'-biisoquinoline *N,N'*-dioxide (**4**), (*S*)-3,3'-bis(3,5-dimethylphenyl)-1,1'-biisoquinoline *N,N'*-dioxide (**5**), and (*S*)-3,3'-dibromo-1,1'-



biisoquinoline *N, N'*-dioxide (**7**) were prepared as we previously reported [4]. (*S*)-3,3'-Bis-(1-benzyl-1*H*-1,2,3-triazole-4-yl)-1,1'-biisoquinoline *N, N'*-dioxide (**6**) was prepared as we previously reported [5].

### 2.3. General procedure for allenylation of aldehydes

A small test tube containing a magnetic stirring bar was charged with activated 4 Å molecular sieves powder (100 mg), (*S*)-biisoquinoline *N, N'*-dioxide (2.9 mg, 0.01 mmol), a solution of aldehyde in CH<sub>2</sub>Cl<sub>2</sub> (1.0 M, 100 μL), and CH<sub>2</sub>Cl<sub>2</sub> (200 μL). The resulting mixture was cooled to -78 °C, and then treated with a solution of propargyltrichlorosilane in CH<sub>2</sub>Cl<sub>2</sub> (1.5 M, 100 μL). The reaction mixture was stirred at -78 °C for 12 h, poured into saturated aqueous NaHCO<sub>3</sub> solution (20 mL) cooled to 0 °C, and stirred at room temperature for 30 min. The resulting heterogenous mixture was filtered through a short pad of Celite<sup>®</sup> and extracted three times with CH<sub>2</sub>Cl<sub>2</sub> (5 mL × 3). The combined organic layers were washed with brine, dried over Na<sub>2</sub>SO<sub>4</sub>, filtered, and condensed in vacuo. The resulting crude mixture was purified by flash chromatography on silica gel using EtOAc and hexanes as eluents.

#### (*R*)-1-Phenylbuta-2,3-dien-1-ol (**2a**)

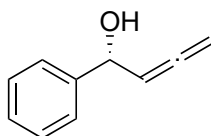

Prepared as described in general procedure using aldehyde **1a** (10.6 mg, 0.1 mmol) to give the title compound in 99% NMR yield. The crude mixture was purified by flash chromatography on silica using 15% EtOAc in hexanes as eluent to afford a pale yellow oil (14.6mg, 99%). All spectra data were identical to literature values [6,7].

<sup>1</sup>H NMR (CDCl<sub>3</sub>): δ 7.42-7.35 (m, 4H), 7.32-7.28 (m, 1H), 5.46 (q, *J* = 6.4 Hz, 1H), 5.30-5.28 (m, 1H), 4.96-4.93 (m, 2H), 2.13 (d, *J* = 4.0 Hz, 1H).

The (*R*)-absolute stereochemistry was assigned by HPLC analysis [9]. er = 88:12; *t*<sub>R</sub> (*R*) 18.6 min; (*S*) 25.3 min, (Daicel Chiralcel<sup>®</sup> OD-H with an OD-H guard column, hexanes/2-propanol = 95/5, 0.5 mL/min, 214 nm).

[α]<sub>D</sub><sup>21</sup> = +6.20 (c = 0.67, CH<sub>2</sub>Cl<sub>2</sub>).

**(R)-1-(4-Chlorophenyl)buta-2,3-dien-1-ol (2b)**

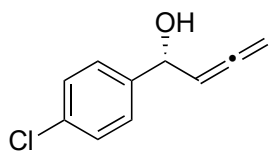

Prepared as described in general procedure using aldehyde **1b** (14.1 mg, 0.1 mmol) to give the title compound in 99% NMR yield. The crude mixture was purified by flash chromatography on silica using 15% EtOAc in hexanes as eluent to afford a viscous oil (17.1 mg, 95%). All spectra data were identical to literature values [6].

$^1\text{H}$  NMR ( $\text{CDCl}_3$ ):  $\delta$  7.36-7.33 (m, 4H), 5.41 (q,  $J = 6.4$  Hz, 1H), 5.28-5.23 (m, 1H), 4.95-4.93 (m, 2H), 2.17 (br, 1H).

The (*R*)-absolute stereochemistry was assigned by HPLC analysis [9]. er = 90:10;  $t_{\text{R}}$  (*R*) 55.7 min; (*S*) 59.5 min, (Daicel Chiralcel<sup>®</sup> OD-H with an OD-H guard column, hexanes/2-propanol = 99/1, 0.5 mL/min, 214 nm).

$[\alpha]_{\text{D}}^{20} = -14.60$  ( $c = 0.76$ ,  $\text{CH}_2\text{Cl}_2$ ).

**(R)-1-(3-Chlorophenyl)buta-2,3-dien-1-ol (2c)**

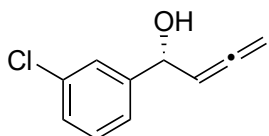

Prepared as described in general procedure using aldehyde **1c** (14.1 mg, 0.1 mmol) to give the title compound in 99% NMR yield. The crude mixture was purified by flash chromatography on silica using 15% EtOAc in hexanes as eluent to afford a viscous oil (17.9 mg, 99%). All spectra data were identical to literature values [7].

$^1\text{H}$  NMR ( $\text{CDCl}_3$ ):  $\delta$  7.41 (s, 1H), 7.30-7.26 (m, 3H), 5.42 (q,  $J = 6.4$  Hz, 1H), 5.27-5.25 (m, 1H), 4.98-4.96 (m, 2H), 2.13 (d,  $J = 4.0$  Hz, 1H).

The (*R*)-absolute stereochemistry was assigned by HPLC analysis [9]. er = 92:8;  $t_{\text{R}}$  (*R*) 18.0 min; (*S*) 19.2 min, (Daicel Chiralcel<sup>®</sup> OD-H with an OD-H guard column, hexanes/2-propanol = 95/5, 0.5 mL/min, 214 nm).

$[\alpha]_{\text{D}}^{21} = -17.51$  ( $c = 0.80$ ,  $\text{CH}_2\text{Cl}_2$ ).

**(R)-1-(2-Chlorophenyl)buta-2,3-dien-1-ol (2d)**

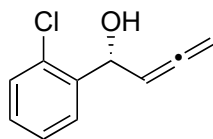

Prepared as described in general procedure using aldehyde **1d** (14.1 mg, 0.1 mmol) to give the title compound in 99% NMR yield. The crude mixture was purified by flash chromatography on silica using 15% EtOAc in hexanes as eluent to afford a viscous oil (18 mg, 99%). All spectra data were identical to literature values [8].

$^1\text{H NMR}$  ( $\text{CDCl}_3$ ):  $\delta$  7.58 (dd,  $J = 7.6, 1.2$  Hz, 1H), 7.36-7.28 (m, 2H) 7.25-7.22 (m, 1H), 5.70-5.64 (m, 1H), 5.48 (q,  $J = 6.4$  Hz, 1H), 4.94 (dd,  $J = 6.4, 2.8$  Hz, 2H), 2.32 (d,  $J = 4.4$  Hz, 1H).

The (*R*)-absolute stereochemistry was assigned by HPLC analysis [8]. er = 88:12;  $t_{\text{R}}$  (*R*) 47.2 min; (*S*) 54.9 min, (Daicel Chiralcel<sup>®</sup> OD-H with an OD-H guard column, hexanes/2-propanol = 99/1, 0.5 mL/min, 214 nm).

$[\alpha]_{\text{D}}^{21} = +14.56$  ( $c = 0.85, \text{CH}_2\text{Cl}_2$ ).

**(R)-1-(4-(Trifluoromethyl)phenyl)buta-2,3-dien-1-ol (2e)**

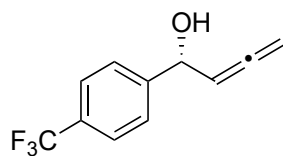

Prepared as described in general procedure using aldehyde **1e** (17.4 mg, 0.1 mmol) to give the title compound in 97% NMR yield. The crude mixture was purified by flash chromatography on silica using 15% EtOAc in hexanes as eluent to afford a viscous oil (19 mg, 89%). All spectra data were identical to literature values [8].

$^1\text{H NMR}$  ( $\text{CDCl}_3$ ):  $\delta$  7.62 (d,  $J = 8.0$  Hz, 2H), 7.52 (d,  $J = 8.4$  Hz, 2H), 5.41 (q,  $J = 6.4$  Hz, 1H), 5.37-5.32 (m, 1H), 4.97-4.95 (m, 2H), 2.24 (d,  $J = 3.6$  Hz, 1H).

The (*R*)-absolute stereochemistry was assigned by HPLC analysis [8]. er = 86.5:13.5;  $t_{\text{R}}$  (*R*) 32.5 min; (*S*) 36.5 min, (Daicel Chiralpak<sup>®</sup> AD-H with an AD-H guard column, hexanes/2-propanol = 98/2, 0.5 mL/min, 214 nm).

$[\alpha]_{\text{D}}^{21} = -7.53$  ( $c = 0.6, \text{CH}_2\text{Cl}_2$ ).

**(R)-1-(4-Bromophenyl)buta-2,3-dien-1-ol (2f)**

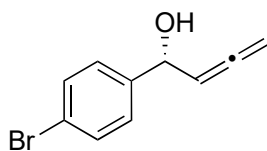

Prepared as described in general procedure using aldehyde **1f** (18.5 mg, 0.1 mmol) to give the title compound in 99% NMR yield. The crude mixture was purified by flash chromatography on silica using 15% EtOAc in hexanes as eluent to afford a viscous oil (21.3 mg, 95%). All spectra data were identical to literature values [6].

$^1\text{H}$  NMR ( $\text{CDCl}_3$ ):  $\delta$  7.49 (d,  $J = 8.4$  Hz, 2H), 7.28 (d,  $J = 8.4$  Hz, 2H), 5.39 (q,  $J = 6.4$  Hz, 1H), 5.27-5.22 (m, 1H), 4.96-4.93 (m, 2H), 2.15 (d,  $J = 3.6$  Hz, 1H).

The (*R*)-absolute stereochemistry was assigned by HPLC analysis [8]. er = 89.5:10.5;  $t_R$  (*R*) 79.5 min; (*S*) 88.9 min, (Daicel Chiralpak<sup>®</sup> AD-H with an AD-H guard column, hexanes/2-propanol = 99/1, 0.5 mL/min, 214 nm).

$[\alpha]_D^{21} = +6.16$  ( $c = 0.64$ ,  $\text{CH}_2\text{Cl}_2$ ).

**(R)-1-(*p*-Tolyl)buta-2,3-dien-1-ol (2g)**

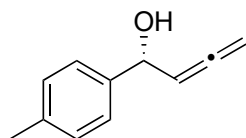

Prepared as described in general procedure using aldehyde **1g** (12.0 mg, 0.1 mmol) to give the title compound in 77% NMR yield. The crude mixture was purified by flash chromatography on silica using 20% EtOAc in hexanes as eluent to afford a viscous oil (11.4 mg, 71%). All spectra data were identical to literature values [6].

$^1\text{H}$  NMR ( $\text{CDCl}_3$ ):  $\delta$  7.30 (d,  $J = 8.0$  Hz, 2H), 7.17 (d,  $J = 8.0$  Hz, 2H), 5.43 (q,  $J = 6.4$  Hz, 1H), 5.27-5.22 (m, 1H), 4.95-4.92 (m, 2H), 2.35 (s, 3H), 2.10 (d,  $J = 4$  Hz, 1H).

The (*R*)-absolute stereochemistry was assigned by HPLC analysis [9]. er = 88:12;  $t_R$  (*R*) 21.4 min; (*S*) 24.2 min, (Daicel Chiralpak<sup>®</sup> AD-H with an AD-H guard column, hexanes/2-propanol = 95/5, 0.5 mL/min, 214 nm).

$[\alpha]_D^{20} = -1.25$  ( $c = 0.50$ ,  $\text{CH}_2\text{Cl}_2$ ).

**(R)-1-(4-Methoxyphenyl)buta-2,3-dien-1-ol (2h)**

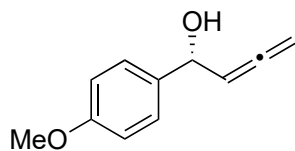

Prepared as described in general procedure using aldehyde **1h** (13.6 mg, 0.1 mmol) to give the title compound in 45% NMR yield. The crude mixture was purified by flash chromatography on silica using 20% EtOAc in hexanes as eluent to afford a pale yellow oil (7.3 mg, 41%). All spectra data were identical to literature values [6].

$^1\text{H NMR}$  ( $\text{CDCl}_3$ ):  $\delta$  7.33 (d,  $J = 8.8$ , 2H), 6.90 (d,  $J = 8.8$ , 2H), 5.44 (q,  $J = 6.4$ , 1H), 5.27-5.21 (m, 1H), 4.95-4.92 (m, 2H), 3.81 (s, 3H), 2.06 (d,  $J = 4$  Hz, 1H).

The (*R*)-absolute stereochemistry was assigned by HPLC analysis [9]. er = 91:9;

$t_R$  (*R*) 26.0 min; (*S*) 33.9 min, (Daicel Chiralpak<sup>®</sup> OD-H with an OD-H guard column, hexanes/2-propanol = 95/5, 0.5 mL/min, 214 nm).

$[\alpha]_D^{20} = +20.44$  ( $c = 0.32$ ,  $\text{CH}_2\text{Cl}_2$ ).

**(R)-1-(Furan-2-yl)buta-2,3-dien-1-ol (2i)**

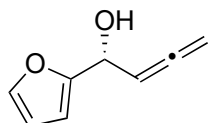

Prepared as described in general procedure using aldehyde **1i** (9.6 mg, 0.1 mmol) to give the title compound in 34% NMR yield. The crude mixture was purified by flash chromatography on silica using 20% EtOAc in hexanes as eluent to afford a viscous oil (3 mg, 22%). All spectra data were identical to literature values [9].

$^1\text{H NMR}$  ( $\text{CDCl}_3$ )  $\delta$  7.41 (br s, 1H), 6.35-6.34 (m, 1H), 6.31 (d,  $J = 3.2$  Hz, 2H), 5.54 (q,  $J = 6.4$  Hz, 1H), 5.30-5.25 (m, 1H), 4.99-4.97 (m, 2H), 2.16 (d,  $J = 5.6$  Hz, 1H).

The (*R*)-absolute stereochemistry was assigned by HPLC analysis [9]. er = 67.5:32.5;

$t_R$  (*S*) 32.5 min; (*R*) 27.0 min, (Daicel Chiralcel<sup>®</sup> OD-H with an OD-H guard column, hexanes/2-propanol = 95/5, 0.5 mL/min, 214 nm).

$[\alpha]_D^{21} = +17.3$  ( $c = 0.10$ ,  $\text{CH}_2\text{Cl}_2$ ).

### (*S,E*)-1-Phenylhexa-1,4,5-trien-3-ol (**2j**)

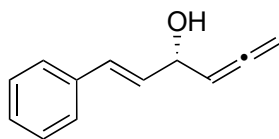

Prepared as described in general procedure using aldehyde **1j** (13.2 mg, 0.1 mmol) to give the title compound in 43% NMR yield. The crude mixture was purified by flash chromatography on silica using 20% EtOAc in hexanes as eluent to afford a viscous oil (7.5 mg, 44%). All spectra data were identical to literature values [6].

$^1\text{H NMR}$  ( $\text{CDCl}_3$ )  $\delta$  7.40 (d,  $J = 7.2$  Hz, 2H), 7.32 (t,  $J = 7.2$  Hz, 2H), 7.26 (t,  $J = 5.2$  Hz, 1H), 6.65 (d,  $J = 16.0$  Hz, 1H), 6.28 (dd,  $J = 16.0, 6.4$  Hz, 1H), 5.38 (q,  $J = 6.4$  Hz, 1H), 4.94 (dd,  $J = 6.4, 2.4$  Hz, 2H), 4.90-4.84 (m, 1H), 1.89 (d,  $J = 4.4$  Hz, 1H).

The (*S*)-absolute stereochemistry was assigned by HPLC analysis [9]. er = 61:39;  $t_R$  (*S*) 13.0 min; (*R*) 14.5 min, (Daicel Chiralpak<sup>®</sup> AS-H with an AS-H guard column, hexanes/2-propanol = 90/10, 0.5 mL/min, 214 nm).

$[\alpha]_D^{21} = +13.29$  ( $c = 0.23$ ,  $\text{CH}_2\text{Cl}_2$ ).

### (*S*)-1-Phenylhexa-4,5-dien-3-ol (**2k**)

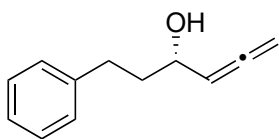

Prepared as described in general procedure using aldehyde **1k** (13.4 mg, 0.1 mmol) to give the title compound in 38% NMR yield. The crude mixture was purified by flash chromatography on silica using 15% EtOAc in hexanes as eluent to afford a viscous oil (8.6 mg, 49%). All spectra data were identical to literature values [6].

$^1\text{H NMR}$  ( $\text{CDCl}_3$ )  $\delta$  7.27-7.17 (m, 5H), 5.28 (q,  $J = 6.4$  Hz, 1H), 4.89 (dd,  $J = 6.4, 2.4$  Hz, 2H), 4.25-4.16 (m, 1H), 2.78-2.7 (m, 2H), 1.93-1.87 (m, 2H), 1.67 (d,  $J = 4.4$  Hz, 1H).

The (*S*)-absolute stereochemistry was assigned by HPLC analysis [9]. er = 74:26;  $t_R$  (*S*) 23.4 min; (*R*) 34.8 min, (Daicel Chiralcel<sup>®</sup> OD-H with an OD-H guard column, hexanes/2-propanol = 95/5, 0.5 mL/min, 214 nm).

$[\alpha]_D^{21} = +5.97$  ( $c = 0.33$ ,  $\text{CH}_2\text{Cl}_2$ ).

### 3. Computations

All calculations were performed using the Gaussian 16 software package [10]. All structures were optimized using the M06-2X [11] functional and 6-311G(d) [12] basis set as implemented in Gaussian 16. Hessians were calculated with the same level of theory as the optimizations. The final energies were further improved by performing single point calculations with 6-311++g(d,p) [12,13] basis set on optimized structures. To simulate experimentally used *N,N*-diisopropylethylamine solvent, diethylamine was used in self-consistent reaction field-SMD implicit solvent model (SCRF-SMD) [14]. The dispersion corrections were included by performing single point calculations using Grimme D3 function [15]. Zero-point vibrational (unscaled), thermal (at 298.15 K and 1 atm), solvent, dispersion, and entropy corrections (at 298.15 K) were added to the final energies of the optimized structures.

### 4. References

1. Still, W. C., Kahn, M., Mitra, A., *J. Org. Chem.* **1978**, *43*, 2923-2925.
2. Iseki, K., Kuroki, Y., Kobayashi, Y. *Tetrahedron: Asymmetry*, **1998**, *9*, 2889-2894.
3. Nakajima, M., Saito, M., Shiro, M., Hashimoto, S. *J. Am. Chem. Soc.* **1998**, *120*, 6419-6420.
4. Reep, C., Morgante, P., Peverati, R., Takenaka, N. *Org. Lett.* **2018**, *20*, 5757-5761.
5. Sun, S., Reep, C., Zhang, C., Captain, B., Peverati, R., Takenaka, N. *Tetrahedron Letters*, **2021**, *81*, 153338.
6. Reddy, L. R., *Chem Commun.*, **2012**, *48*, 9189-9191.
7. Schneider, U., Sugiura, M., Kobayashi, S. *Tetrahedron*, **2006**, *62*, 496-502.
8. Zhang, T., Zhu, C. *Synlett.*, **2024**, *35*, 1170-1174.
9. Li, W., Lin, Z., Chen, L., Tian, X., Wang, Y., Huang, S.-H., Hong, R., *Tetrahedron Letters*, **2016**, *57*, 603-606.
10. Frisch, M.J., et al., *Gaussian 16 Rev. C.01*. 2016: Wallingford, CT.
11. Zhao, Y. and D.G. Truhlar, *The M06 suite of density functionals for main group thermochemistry, thermochemical kinetics, noncovalent interactions, excited states, and transition elements: two new functionals and systematic testing of four*

- M06-class functionals and 12 other functionals*. Theoretical chemistry accounts, 2008. **120**: p. 215-241.
12. Krishnan, R., et al., *Self-consistent molecular orbital methods. XX. A basis set for correlated wave functions*. The Journal of chemical physics, 1980. **72**(1): p. 650-654.
  13. Clark, T., et al., *Efficient diffuse function-augmented basis sets for anion calculations. III. The 3-21+ G basis set for first-row elements, Li-F*. Journal of Computational Chemistry, 1983. **4**(3): p. 294-301.
  14. Cancès, E., B. Mennucci, and J. Tomasi, *A new integral equation formalism for the polarizable continuum model: Theoretical background and applications to isotropic and anisotropic dielectrics*. The Journal of chemical physics, 1997. **107**(8): p. 3032-3041.
  15. Grimme, S., S. Ehrlich, and L. Goerigk, *Effect of the damping function in dispersion corrected density functional theory*. Journal of computational chemistry, 2011. **32**(7): p. 1456-1465.



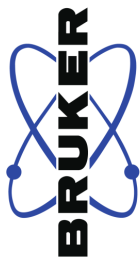

03-27-2024\_propargyltrichlorosilane

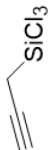

Current Data Parameters  
NAME Mar27-2024  
EXPNO 10  
PROCNO 1

F2 - Acquisition Parameters  
Date\_ 20240327  
Time 18.50  
INSTRUM spect  
PROBHD 5 mm PABBO BB-  
PULPROG zg30  
TD 65536  
SOLVENT CDCl3  
NS 8  
DS 2  
SWH 8278.146 Hz  
FIDRES 0.126314 Hz  
AQ 3.9583745 sec  
RG 256  
DW 60.400 usec  
DE 6.50 usec  
TE 297.1 K  
D1 1.0000000 sec  
TD0 1

===== CHANNEL f1 =====  
NUC1 1H  
P1 11.60 usec  
PL1 0 dB  
SFO1 400.1324710 MHz

F2 - Processing parameters  
SI 32768  
SF 400.1300103 MHz  
WDW EM  
SSB 0  
LB 0.30 Hz  
GB 0  
PC 1.00

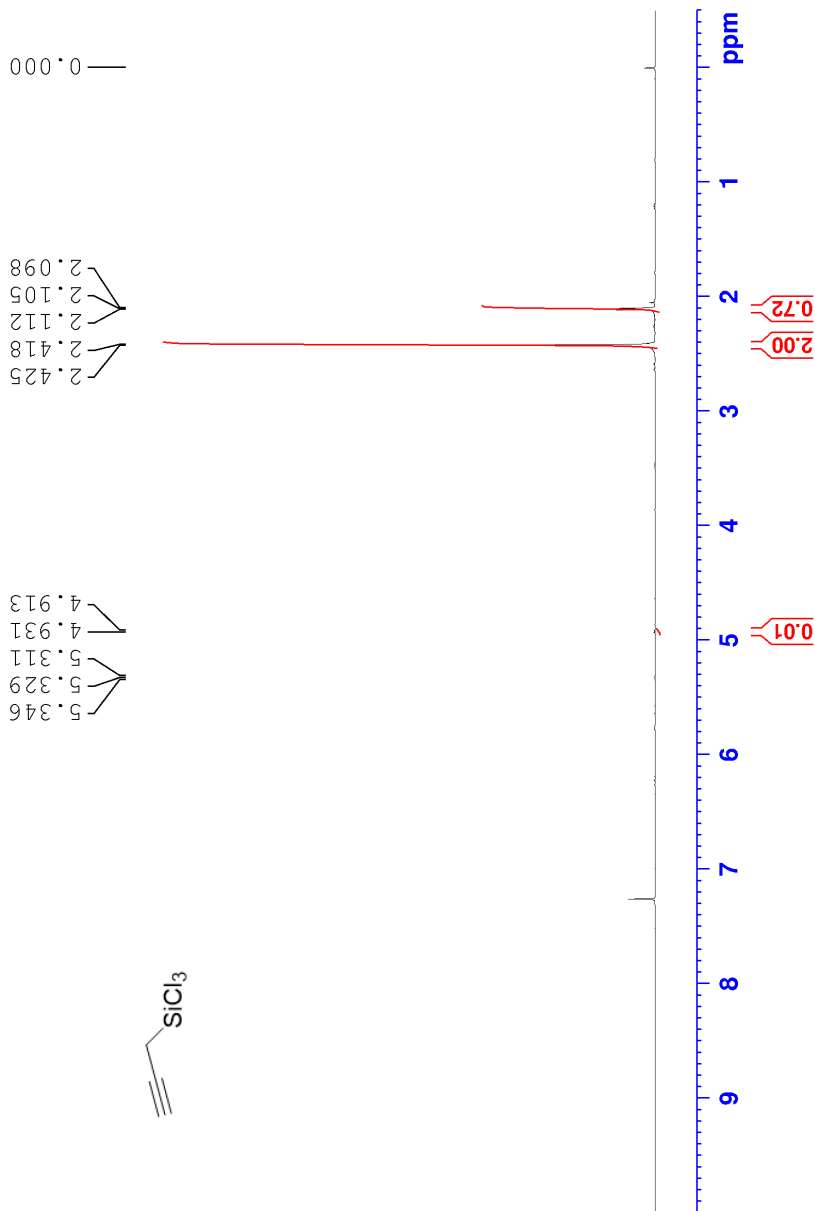

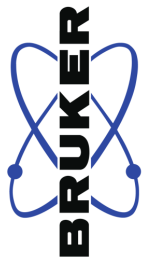

NB-I 172 isolated

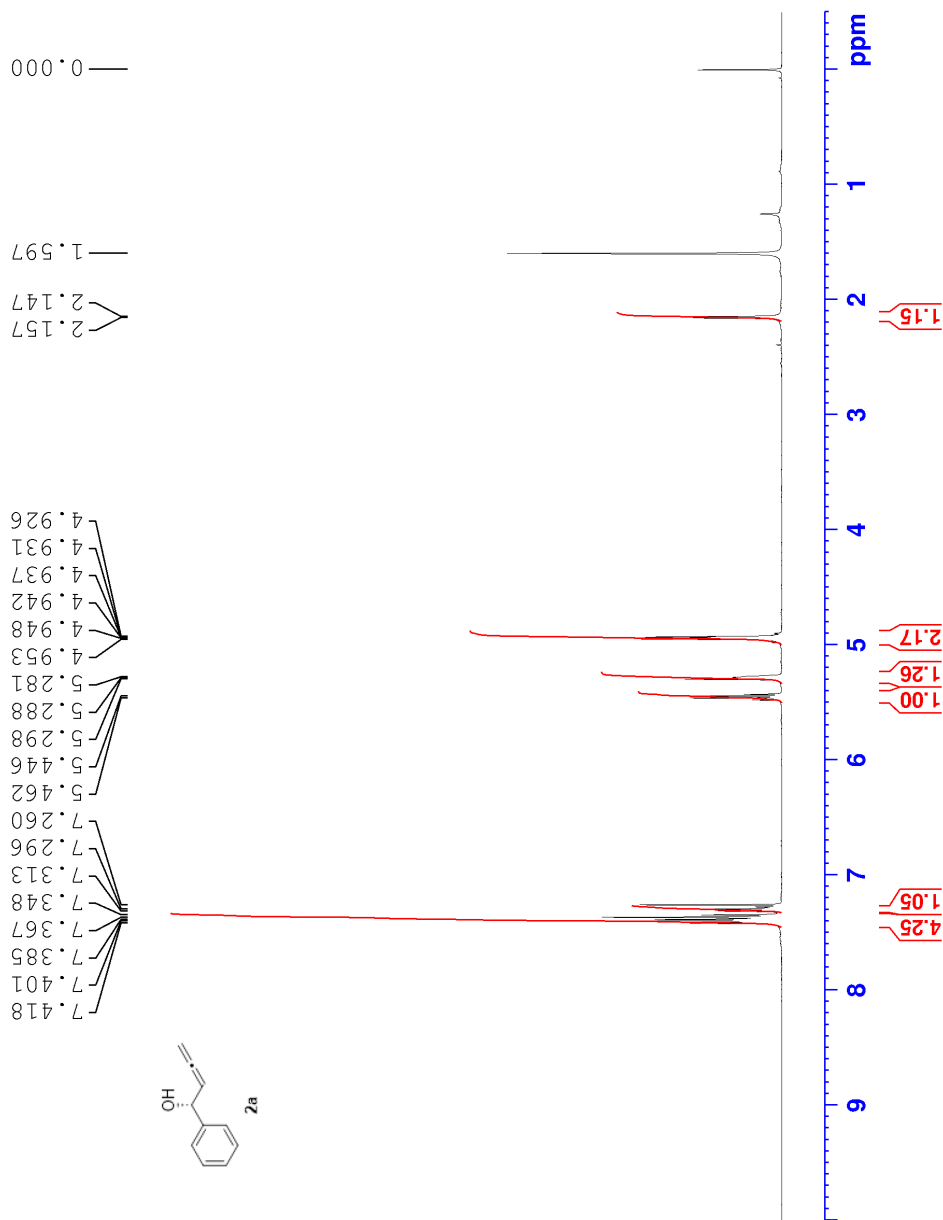

Current Data Parameters  
NAME May07-2024  
EXPNO 2  
PROCNO 1

F2 - Acquisition Parameters  
Date\_ 20240507  
Time 16.32  
INSTRUM spect  
PROBHD 5 mm TBI 1H/31  
PULPROG zg30  
TD 65536  
SOLVENT CDC13  
NS 16  
DS 2  
SWH 8278.146 Hz  
FIDRES 0.126314 Hz  
AQ 3.9583745 sec  
RG 512  
DW 60.400 usec  
DE 6.50 usec  
TE 300.0 K  
D1 1.00000000 sec  
TD0 1

==== CHANNEL f1 =====  
NUC1 1H  
P1 18.75 usec  
PL1 0.50 dB  
SFO1 400.1324710 MHz

F2 - Processing parameters  
SI 32768  
SF 400.1300038 MHz  
WDW EM  
SSB 0  
LB 0.30 Hz  
GB 0  
PC 1.00

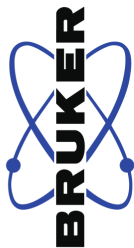

NB-I 174 isolated

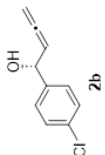

Current Data Parameters  
NAME May08-2024  
EXPNO 3  
PROCNO 1  
F2 - Acquisition Parameters  
Date\_ 20240508  
Time 16.12  
INSTRUM spect  
PROBHD 5 mm TBI 1H/31  
PULPROG zg30  
TD 65536  
SOLVENT CDCl3  
NS 16  
DS 2  
SWH 8278.146 Hz  
FIDRES 0.126314 Hz  
AQ 3.9583745 sec  
RG 512  
DW 60.400 usec  
DE 6.50 usec  
TE 300.0 K  
D1 1.00000000 sec  
TD0 1  
===== CHANNEL f1 =====  
NUC1 1H  
P1 18.75 usec  
PL1 0.50 dB  
SFO1 400.1324710 MHz  
F2 - Processing parameters  
SI 32768  
SF 400.1300093 MHz  
WDW EM  
SSB 0  
LB 0.30 Hz  
GB 0  
PC 1.00

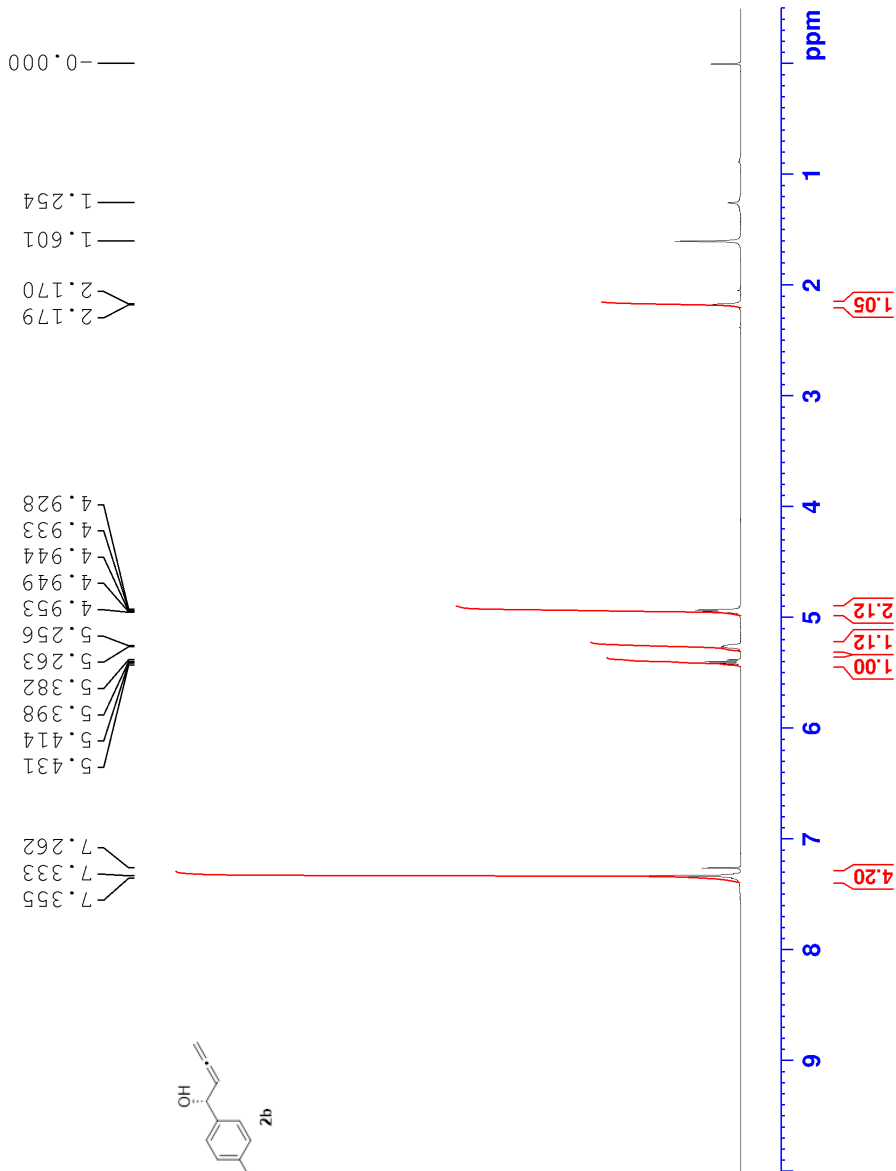

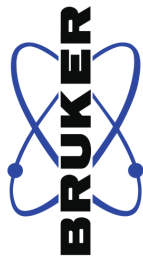

NB-I 182 isolated

Current Data Parameters  
NAME May11-2024  
EXPNO 4  
PROCNO 1

F2 - Acquisition Parameters  
Date\_ 20240511  
Time 14-21  
INSTRUM spect  
PROBHD 5 mm TBI IH/31  
PULPROG zg30  
TD 65536  
SOLVENT CDCl3  
NS 16  
DS 2  
SWH 8278.146 Hz  
FIDRES 0.126314 Hz  
AQ 3.9583745 sec  
RG 812.7  
DW 60.400 usec  
DE 6.50 usec  
TE 300.0 K  
D1 1.00000000 sec  
TD0 1

==== CHANNEL f1 =====  
NUC1 1H  
P1 18.75 usec  
PL1 0.50 dB  
SFO1 400.1324710 MHz

F2 - Processing parameters  
SI 32768  
SF 400.1300092 MHz  
WDW EM  
SSB 0  
LB 0.30 Hz  
GB 0  
PC 1.00

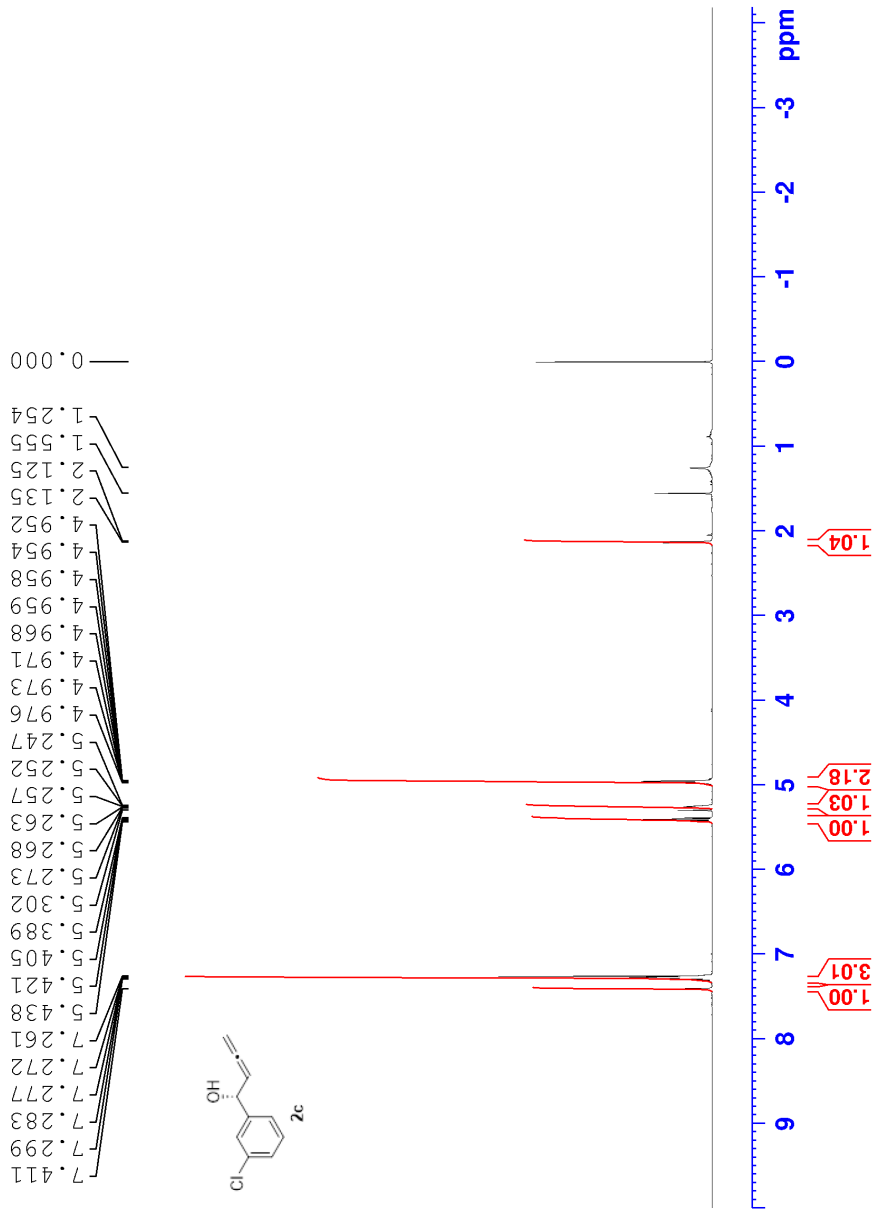

NB-I 180 isolated

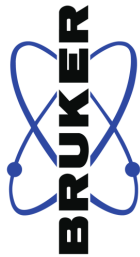

Current Data Parameters  
NAME May10-2024  
EXPNO 7  
PROCNO 1

F2 - Acquisition Parameters  
Date\_ 20240510  
Time\_ 21.38  
INSTRUM spect  
PROBHD 5 mm TBI IH/31  
PULPROG zg30  
TD 65536  
SOLVENT CDC13  
NS 16  
DS 2  
SWH 8278.146 Hz  
FIDRES 0.126314 Hz  
AQ 3.9583745 sec  
RG 512  
DW 60.400 usec  
DE 6.50 usec  
TE 300.0 K  
D1 1.00000000 sec  
TD0 1

==== CHANNEL f1 =====  
NUC1 1H  
P1 18.75 usec  
PL1 0.50 dB  
SFO1 400.1324710 MHz

F2 - Processing parameters  
SI 32768  
SF 400.1300089 MHz  
WDW EM  
SSB 0  
LB 0.30 Hz  
GB 0  
PC 1.00

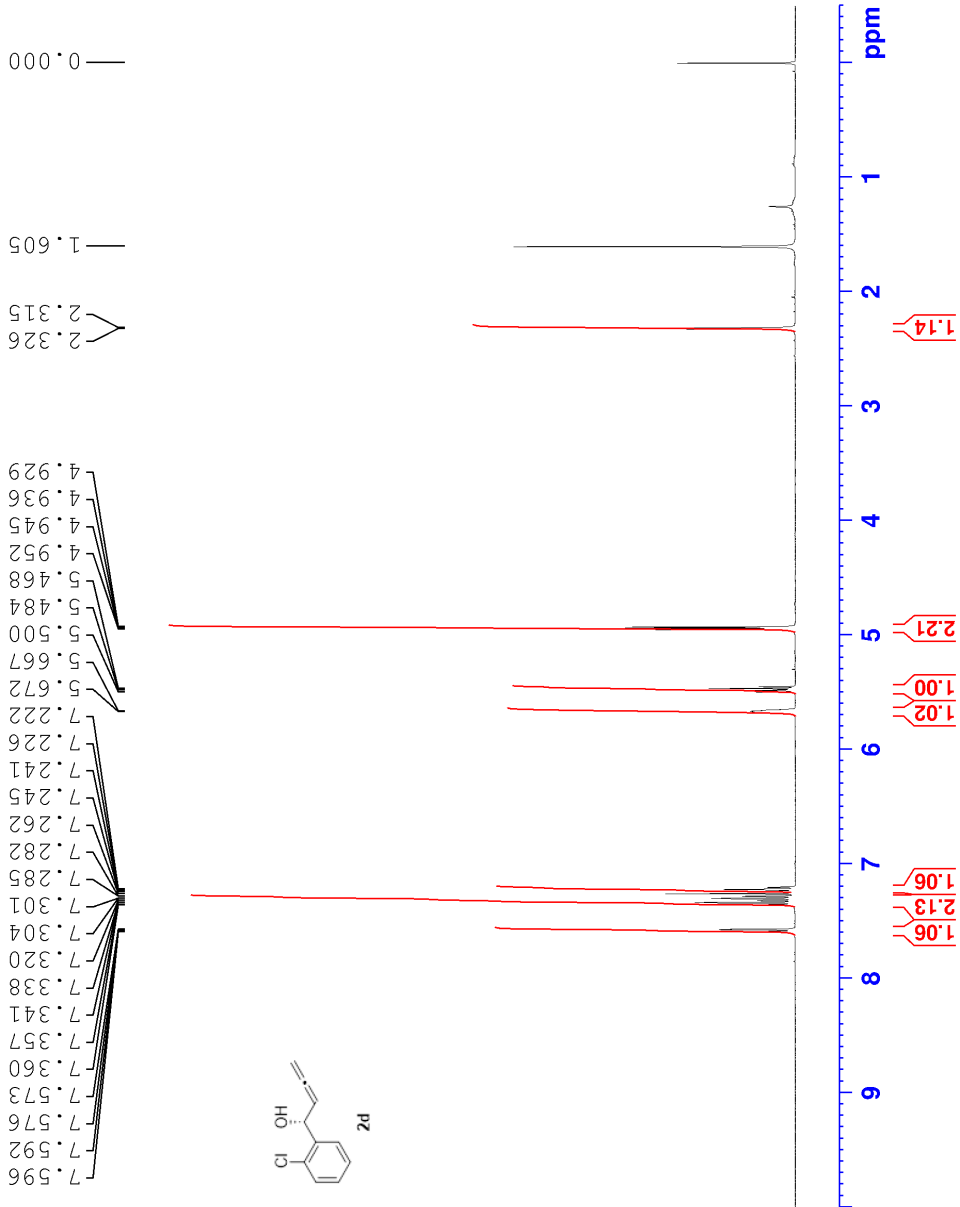

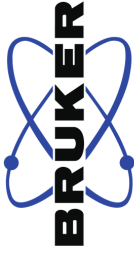

NB-I 181 isolated

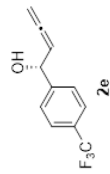

Current Data Parameters  
NAME May11-2024  
EXPNO 1  
PROCNO 1

F2 - Acquisition Parameters  
Date\_ 20240511  
Time\_ 11:50  
INSTRUM spect  
PROBED 5 mm TBI IH/31  
PULPROG zg30  
TD 65536  
SOLVENT CDCl3  
NS 16  
DS 2  
SWH 8278.146 Hz  
FIDRES 0.126314 Hz  
AQ 3.9583745 sec  
RG 574.7  
DW 60.400 usec  
DE 6.50 usec  
TE 300.0 K  
D1 1.00000000 sec  
TD0 1

==== CHANNEL f1 =====  
NUC1 1H  
PI 18.75 usec  
PL1 0.50 dB  
SFO1 400.1324710 MHz

F2 - Processing parameters  
SI 32768  
WDW EM  
SSB 0  
LB 0.30 Hz  
GB 0  
PC 1.00

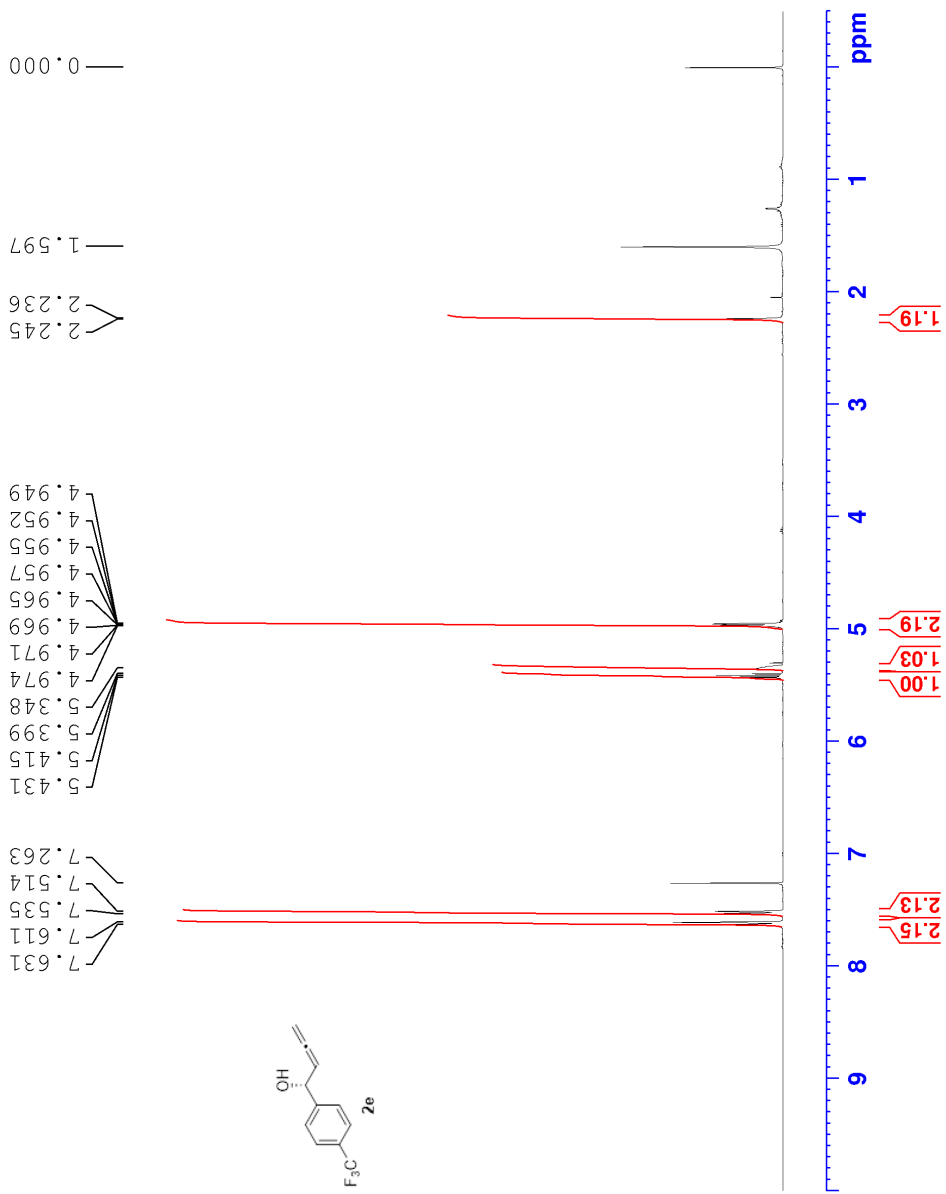

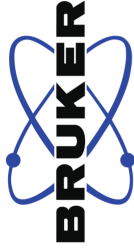

NB-I 179

Current Data Parameters  
NAME May10-2024  
EXPNO 3  
PROCNO 1

F2 - Acquisition Parameters  
Date\_ 20240510  
Time\_ 15:27  
INSTRUM spect  
PROBHD 5 mm TBI LH/31  
PULPROG zg30  
TD 65536  
SOLVENT CDC13  
NS 16  
DS 2  
SWH 8278.146 Hz  
FIDRES 0.126314 Hz  
AQ 3.9583745 sec  
RG 645.1  
DE 60.400 usec  
TE 300.0 K  
D1 1.00000000 sec  
TD0 1

==== CHANNEL f1 =====  
NUC1 1H  
P1 18.75 usec  
PL1 0.50 dB  
SFO1 400.1324710 MHz

F2 - Processing parameters  
SI 32768  
SF 400.1300085 MHz  
WDW EM  
SSB 0  
LB 0.30 Hz  
GB 0  
PC 1.00

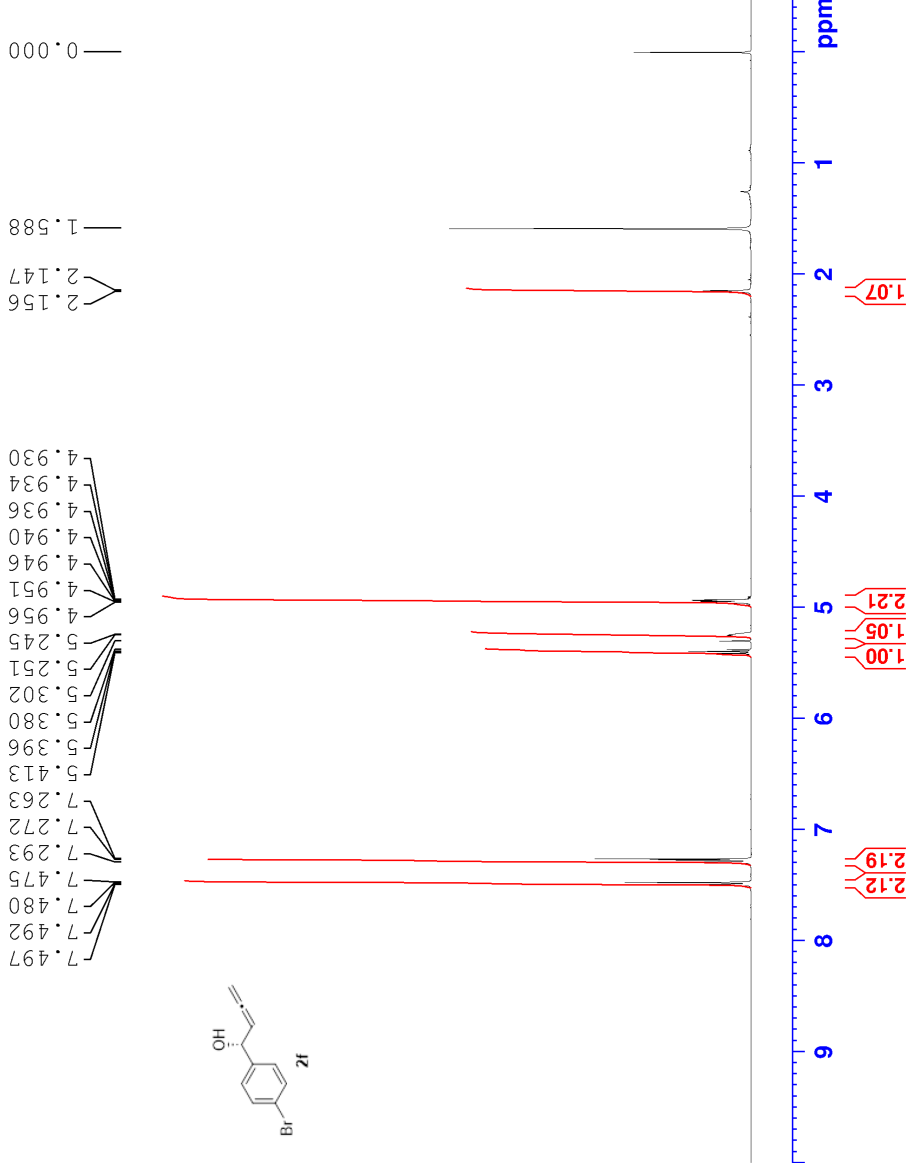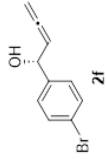

NB-I 176 isolated

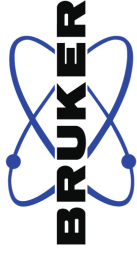

Current Data Parameters  
NAME May09-2024  
EXPNO 2  
PROCNO 1

F2 - Acquisition Parameters  
Date\_ 20240509  
Time 12.36  
INSTRUM spect  
PROBHD 5 mm TBI IH/31  
PULPROG zg30  
TD 65536  
SOLVENT CDCl3  
NS 16  
DS 2  
SWH 8278.146 Hz  
FIDRES 0.126314 Hz  
AQ 3.9583745 sec  
RG 574.7  
DW 60.400 usec  
DE 6.50 usec  
TE 300.0 K  
D1 1.00000000 sec  
TD0 1

==== CHANNEL f1 =====  
NUC1 1H  
P1 18.75 usec  
PL1 0.50 dB  
SFO1 400.1324710 MHz

F2 - Processing parameters  
SI 32768  
SF 400.1300095 MHz  
WDW EM  
SSB 0  
LB 0.30 Hz  
GB 0  
PC 1.00

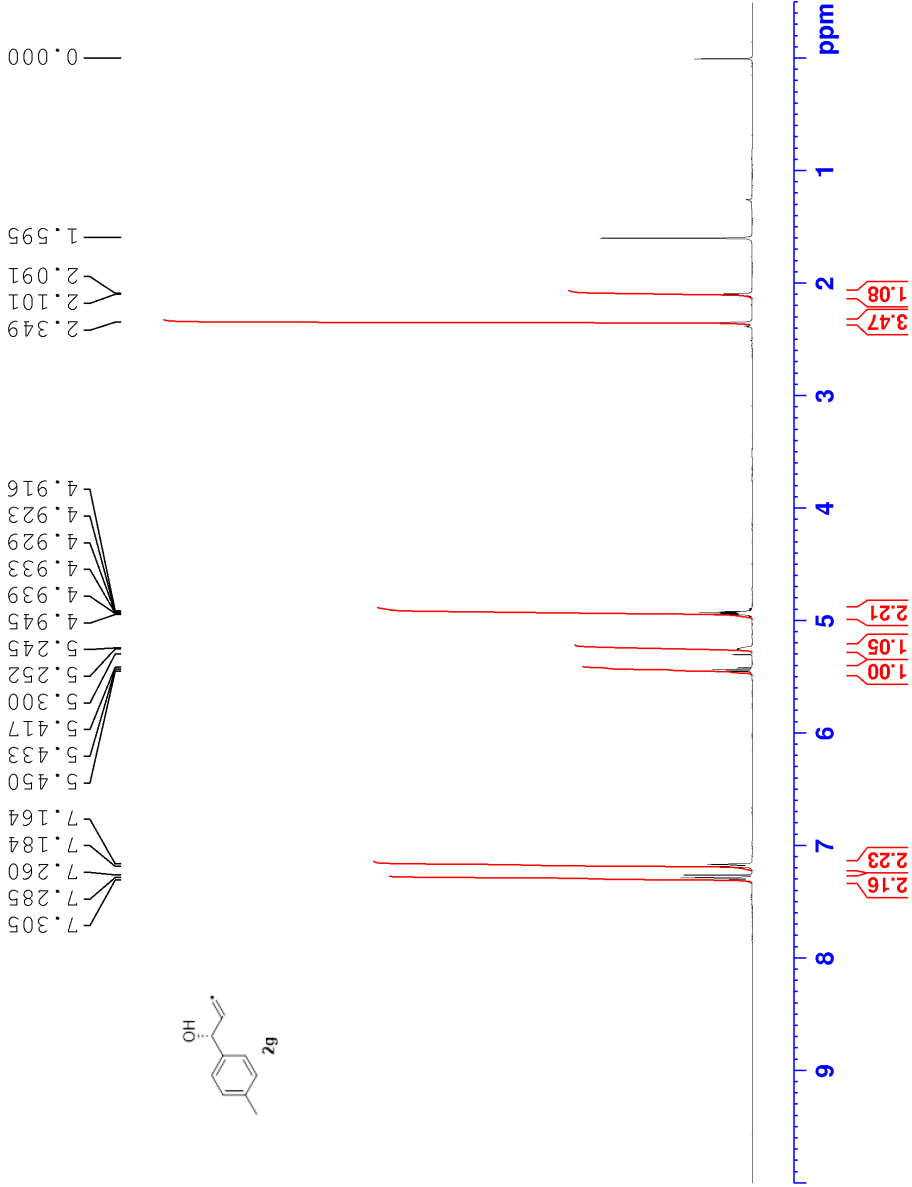



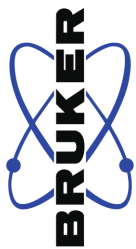

NB-I 173 isolated

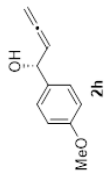

Current Data Parameters  
NAME May09-2024  
EXPNO 1  
PROCNO 1

F2 - Acquisition Parameters  
Date\_ 20240509  
Time\_ 9.56  
INSTRUM spect  
PROBHD 5 mm TBI IH/31  
PULPROG zg30  
TD 65536  
SOLVENT CDCl3  
NS 16  
DS 2  
SWH 8278.146 Hz  
FIDRES 0.126314 Hz  
AQ 3.9583745 sec  
RG 1024  
DW 60.400 usec  
DE 6.50 usec  
TE 300.0 K  
D1 1.00000000 sec  
TD0 1

==== CHANNEL f1 =====  
NUC1 1H  
P1 18.75 usec  
PL1 0.50 dB  
SFO1 400.1324710 MHz

F2 - Processing parameters  
SI 32768  
SF 400.1300085 MHz  
WDW EM  
SSB 0  
LB 0.30 Hz  
GB 0  
PC 1.00

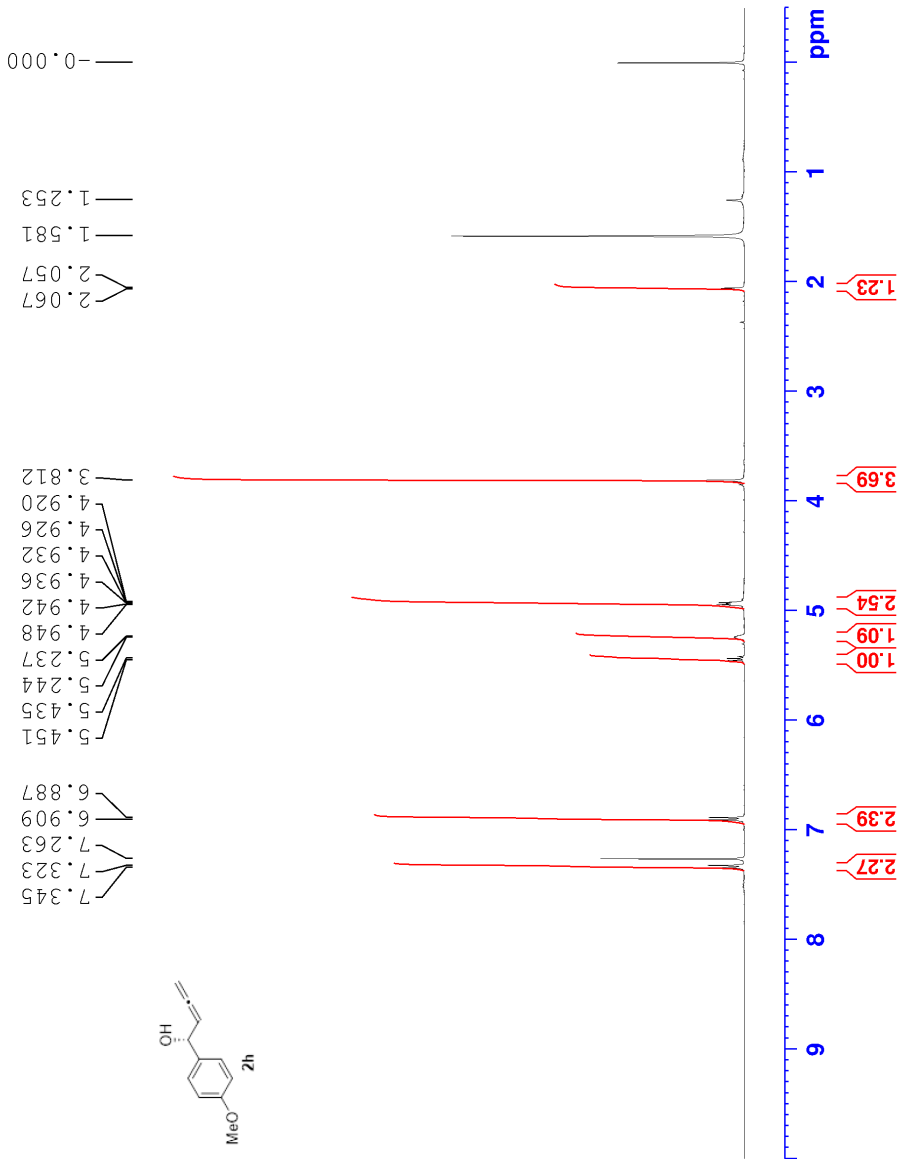

NB-I 178 isolated

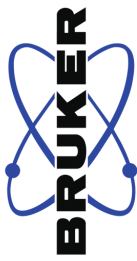

Current Data Parameters  
NAME May11-2024  
EXPNO 2  
PROCNO 1

F2 - Acquisition Parameters  
Date\_ 20240511  
Time 14.07  
INSTRUM spect  
PROBHD 5 mm TBI 1H/31  
PULPROG zg30  
TD 65536  
SOLVENT CDCl3  
NS 16  
DS 2  
SWH 8278.146 Hz  
FIDRES 0.126314 Hz  
AQ 3.9583745 sec  
RG 1290.2  
DW 60.400 usec  
DE 6.50 usec  
TE 300.0 K  
DI 1.00000000 sec  
TD0 1

==== CHANNEL f1 =====  
NUC1 1H  
P1 18.75 usec  
PL1 0.50 dB  
SFO1 400.1324710 MHz

F2 - Processing parameters  
SI 52768  
SF 400.1300085 MHz  
WDW EM  
SSB 0  
LB 0.30 Hz  
GB 0  
PC 1.00

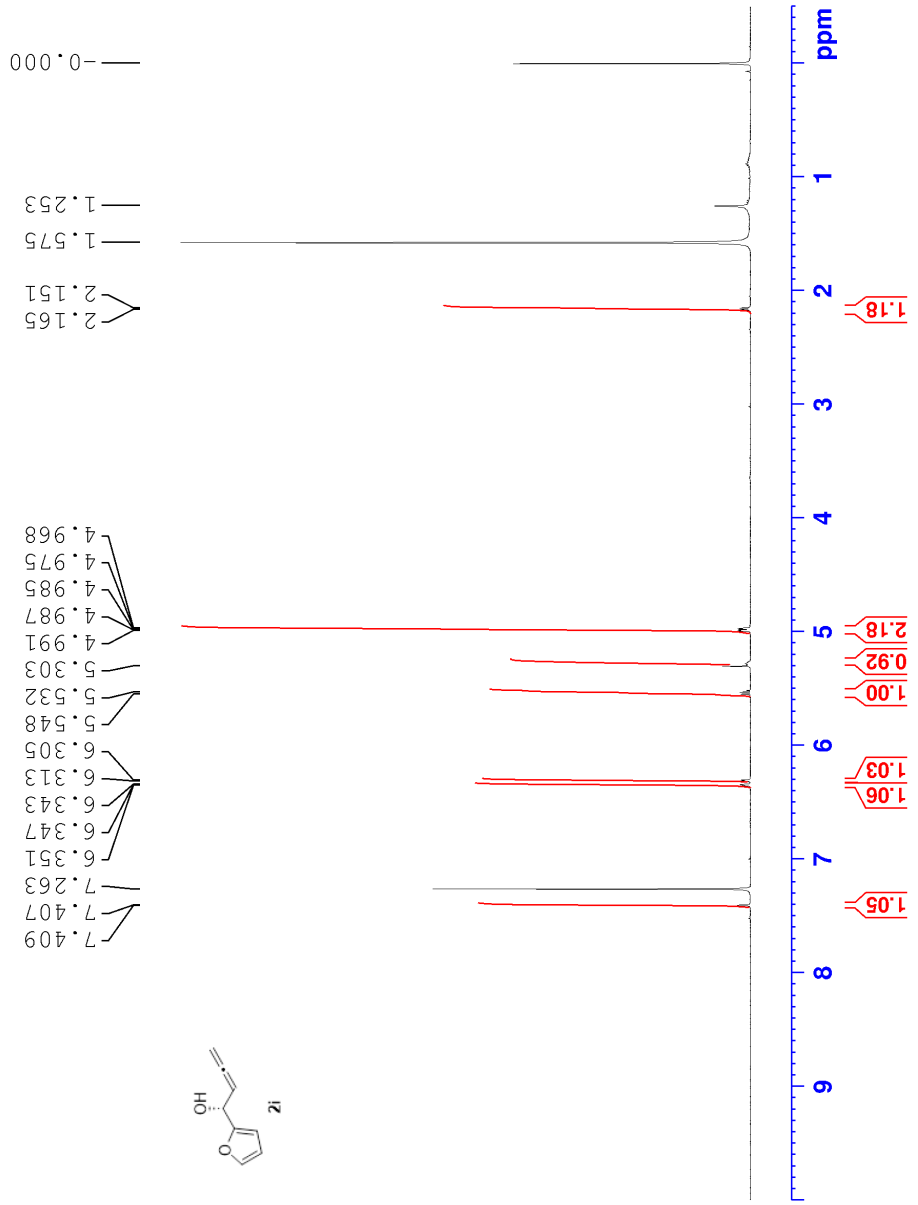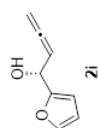

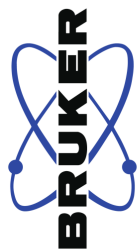

NB-I 177 isolated

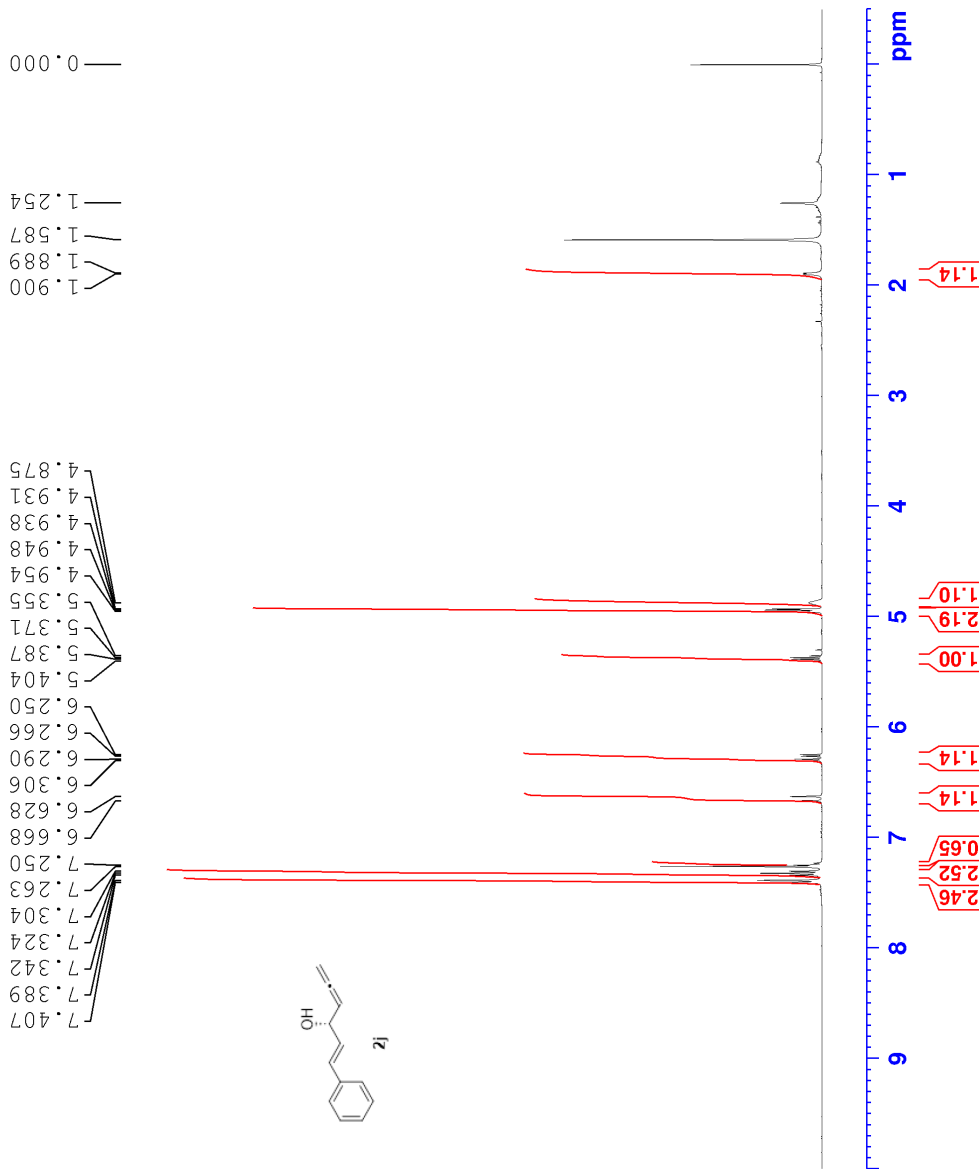

Current Data Parameters  
NAME May09-2024  
EXPNO 3  
PROCNO 1

F2 - Acquisition Parameters  
Date\_ 20240509  
Time 15.52  
INSTRUM spect  
PROBHD 5 mm TBI 1H/31  
PULPROG zg30  
TD 65536  
SOLVENT CDCl3  
NS 16  
DS 2  
SWH 8278.146 Hz  
FIDRES 0.126314 Hz  
AQ 3.9583745 sec  
RG 812.7  
DW 60.400 usec  
DE 6.50 usec  
TE 300.0 K  
D1 1.00000000 sec  
TD0 1

==== CHANNEL f1 =====  
NUC1 1H  
P1 18.75 usec  
PL1 0.50 dB  
SFO1 400.1324710 MHz

F2 - Processing parameters  
SI 32768  
SF 400.1300087 MHz  
WDW EM  
SSB 0  
LB 0.30 Hz  
GB 0  
PC 1.00

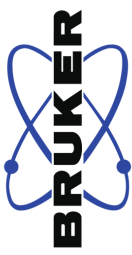

NB-I 175 isolated

Current Data Parameters  
NAME May08-2024  
EXPNO 4  
PROCNO 1

F2 - Acquisition Parameters  
Date\_ 20240508  
Time\_ 20.51  
INSTRUM spect  
PROBHD 5 mm TBI 1H/31  
PULPROG zg30  
ID 65536  
SOLVENT CDCl3  
NS 16  
DS 2  
SWH 8278.146 Hz  
FIDRES 0.126314 Hz  
AQ 3.9583745 sec  
RG 574.7  
DW 60.400 usec  
DE 6.50 usec  
TE 300.0 K  
D1 1.00000000 sec  
TD0 1

==== CHANNEL f1 =====  
NUC1 1H  
P1 18.75 usec  
PL1 0.50 dB  
SF01 400.1324710 MHz

F2 - Processing parameters  
SI 32768  
SF 400.1300092 MHz  
WDW EM  
SSB 0  
LB 0.30 Hz  
GB 0  
PC 1.00

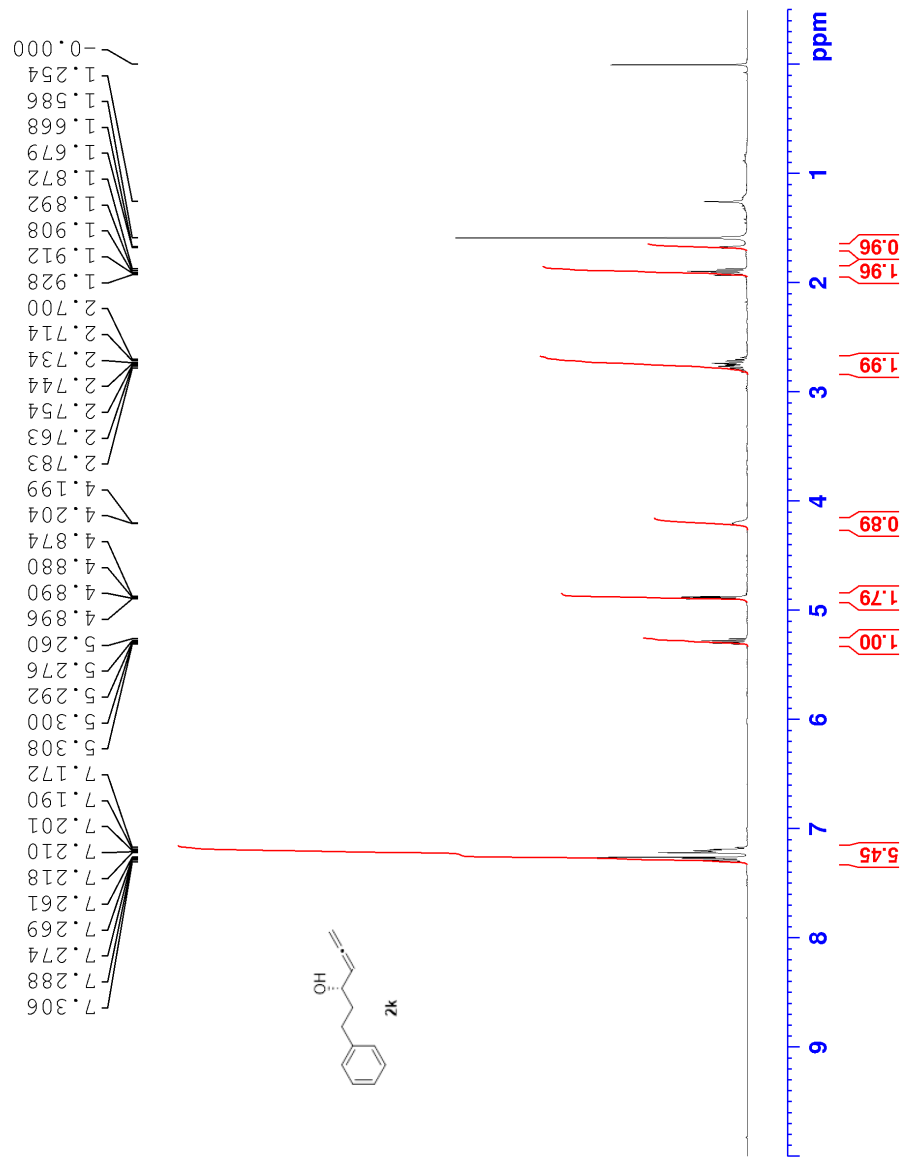

RUN\_1683.DATA - Prostar 335 Absorbance Analog Channel 1 EL05079024

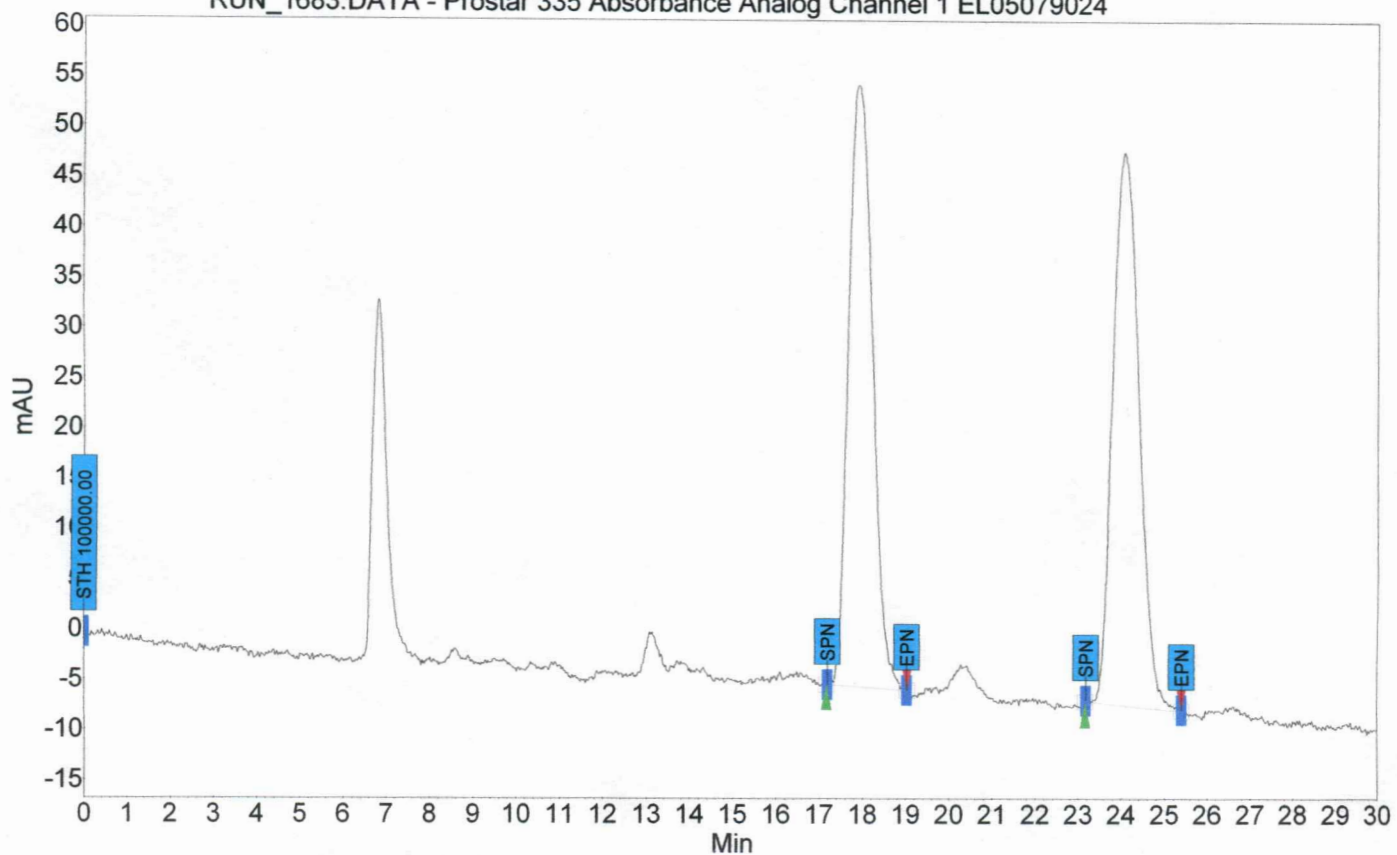

| Index | Name    | Time [Min] | Quantity [% Area] | Height [mAU] | Area [mAU.Min] | Area % [%] |
|-------|---------|------------|-------------------|--------------|----------------|------------|
| 1     | UNKNOWN | 17.92      | 49.68             | 59.9         | 38.7           | 49.681     |
| 2     | UNKNOWN | 24.08      | 50.32             | 55.1         | 39.2           | 50.319     |
| Total |         |            | 100.00            | 115.0        | 77.9           | 100.000    |

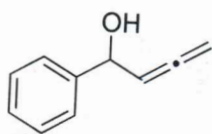

(±)-2a

RUN\_1684.DATA - Prostar 335 Absorbance Analog Channel 1 EL05079024

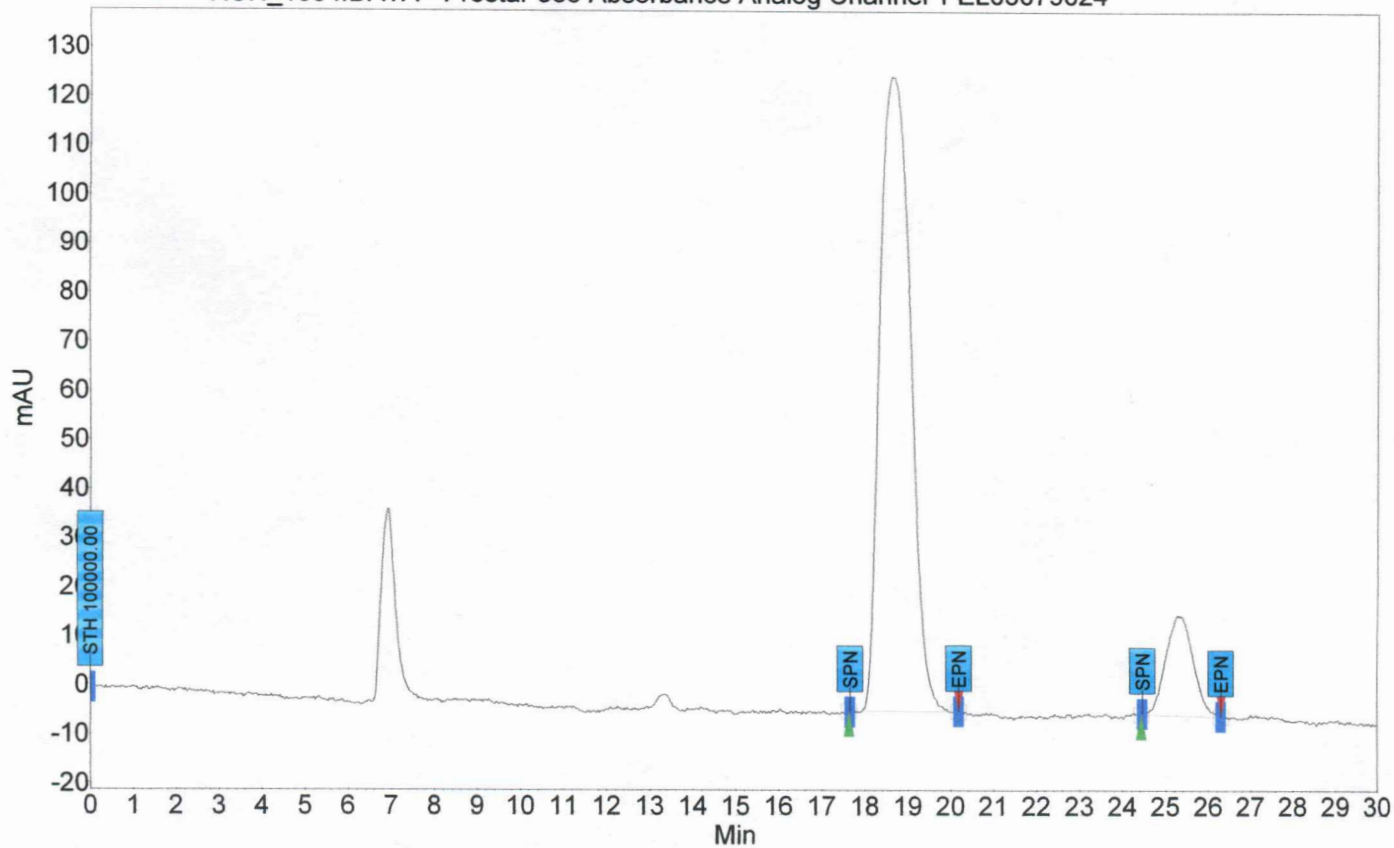

| Index | Name    | Time [Min] | Quantity [% Area] | Height [mAU] | Area [mAU.Min] | Area % [%] |
|-------|---------|------------|-------------------|--------------|----------------|------------|
| 1     | UNKNOWN | 18.63      | 87.57             | 129.6        | 106.9          | 87.570     |
| 2     | UNKNOWN | 25.29      | 12.43             | 20.2         | 15.2           | 12.430     |
| Total |         |            | 100.00            | 149.8        | 122.1          | 100.000    |

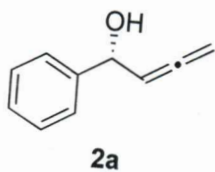

RUN\_1672.DATA - Prostar 335 Absorbance Analog Channel 1 EL05079024

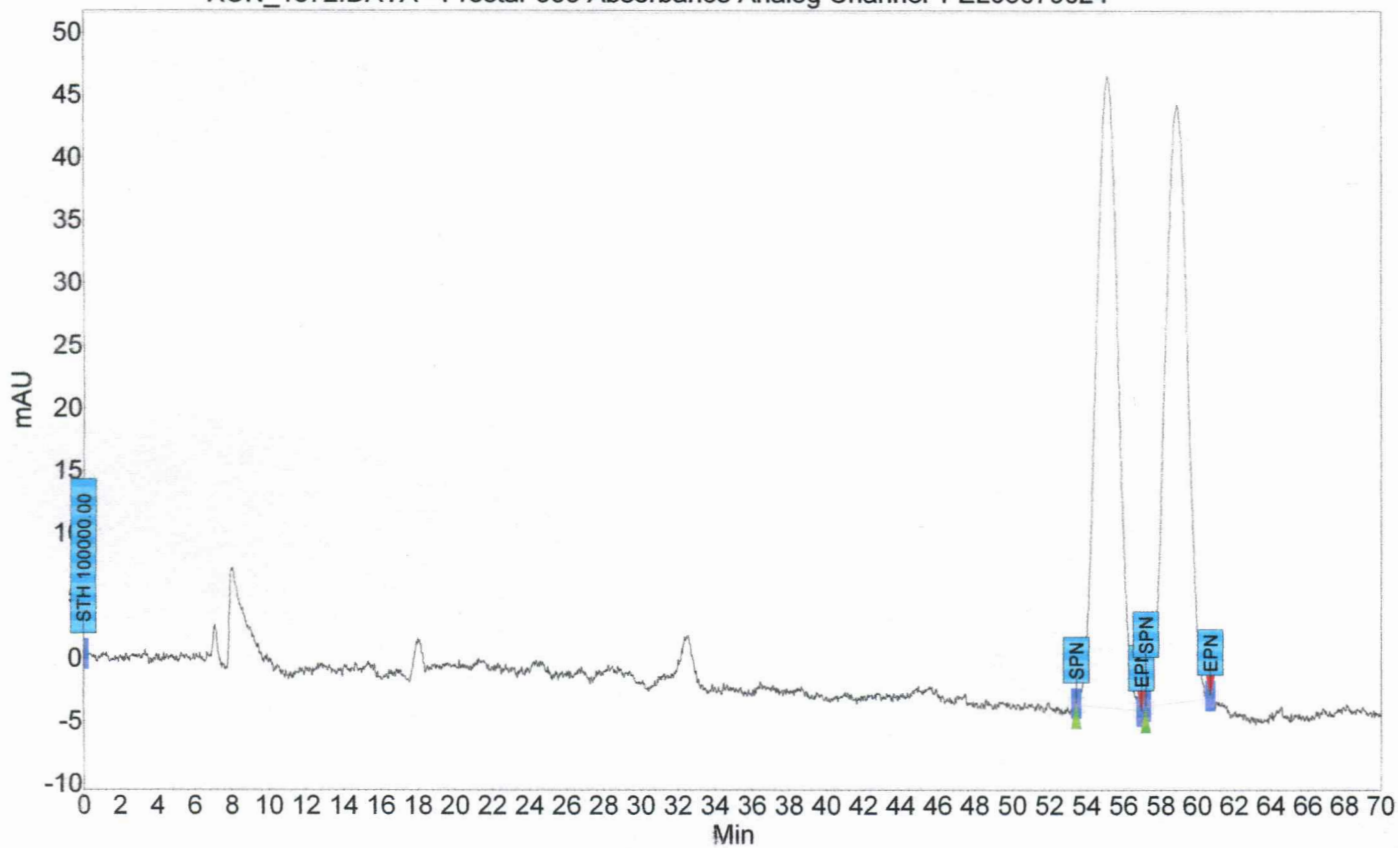

| Index | Name    | Time [Min] | Quantity [% Area] | Height [mAU] | Area [mAU.Min] | Area % [%] |
|-------|---------|------------|-------------------|--------------|----------------|------------|
| 1     | UNKNOWN | 55.11      | 50.80             | 50.5         | 68.9           | 50.799     |
| 2     | UNKNOWN | 58.84      | 49.20             | 47.8         | 66.7           | 49.201     |
| Total |         |            | 100.00            | 98.3         | 135.6          | 100.000    |

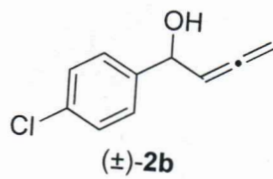

RUN\_1674.DATA - Prostar 335 Absorbance Analog Channel 1 EL05079024

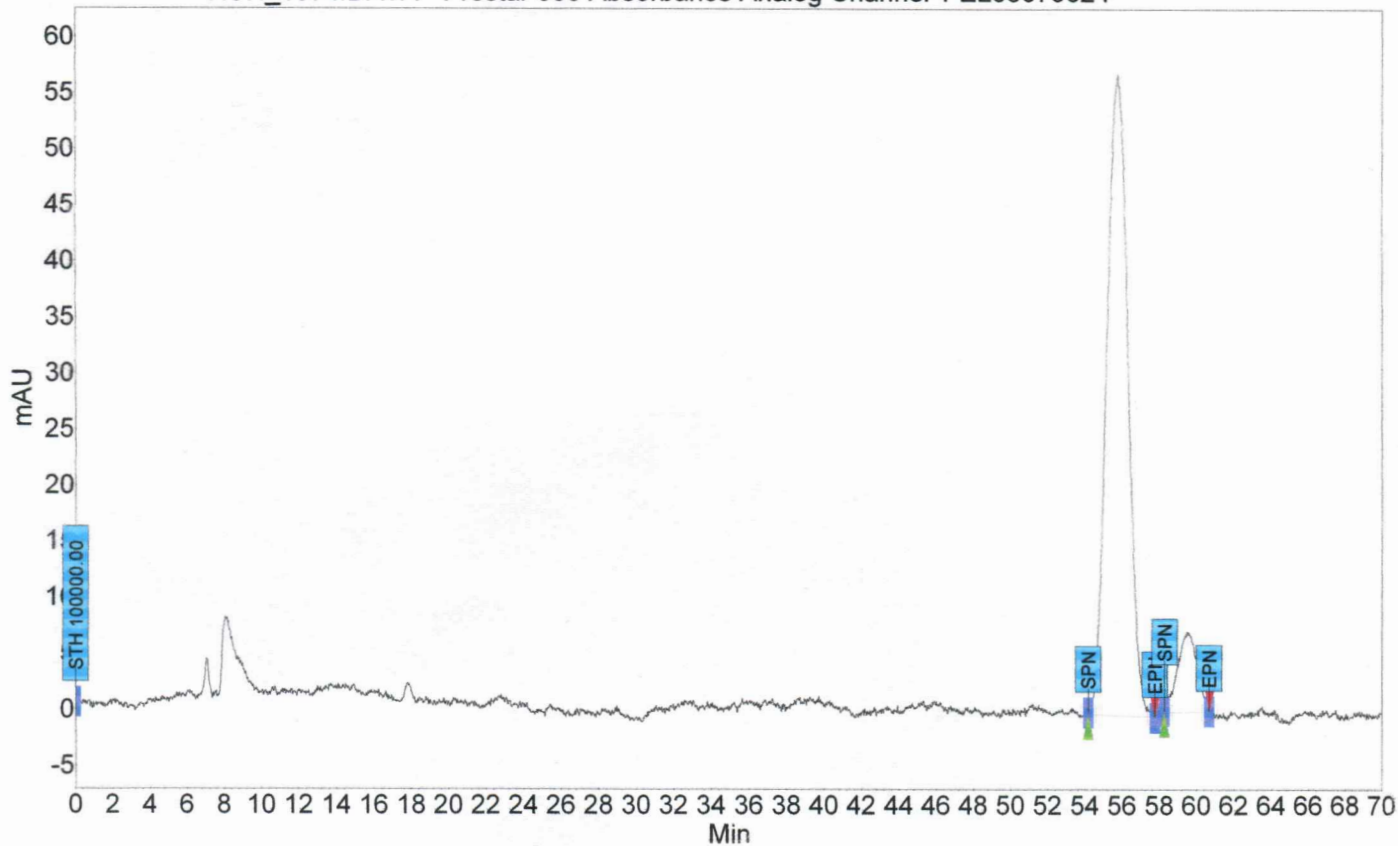

| Index | Name    | Time [Min] | Quantity [% Area] | Height [mAU] | Area [mAU.Min] | Area % [%] |
|-------|---------|------------|-------------------|--------------|----------------|------------|
| 1     | UNKNOWN | 55.71      | 89.85             | 57.2         | 74.9           | 89.852     |
| 2     | UNKNOWN | 59.51      | 10.15             | 7.2          | 8.5            | 10.148     |
| Total |         |            | 100.00            | 64.4         | 83.3           | 100.000    |

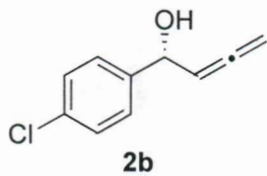



RUN\_1689.DATA - Prostar 335 Absorbance Analog Channel 1 EL05079024

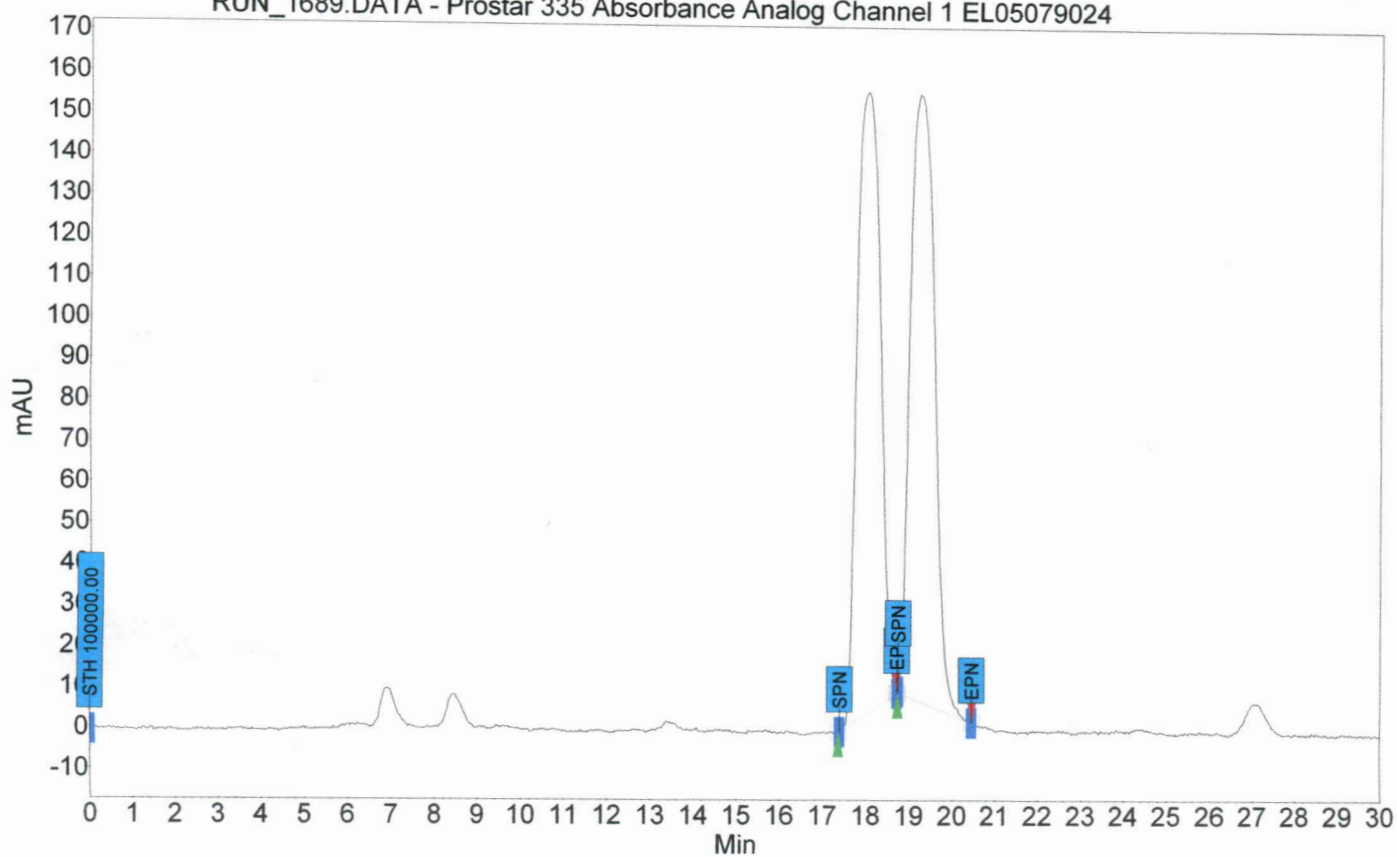

| Index | Name    | Time [Min] | Quantity [% Area] | Height [mAU] | Area [mAU.Min] | Area % [%] |
|-------|---------|------------|-------------------|--------------|----------------|------------|
| 1     | UNKNOWN | 18.01      | 49.44             | 152.3        | 95.0           | 49.437     |
| 2     | UNKNOWN | 19.23      | 50.56             | 148.8        | 97.2           | 50.563     |
| Total |         |            | 100.00            | 301.1        | 192.2          | 100.000    |

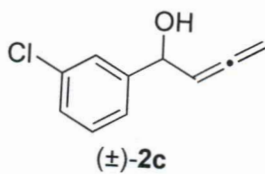

RUN\_1690.DATA - Prostar 335 Absorbance Analog Channel 2 EL05079024

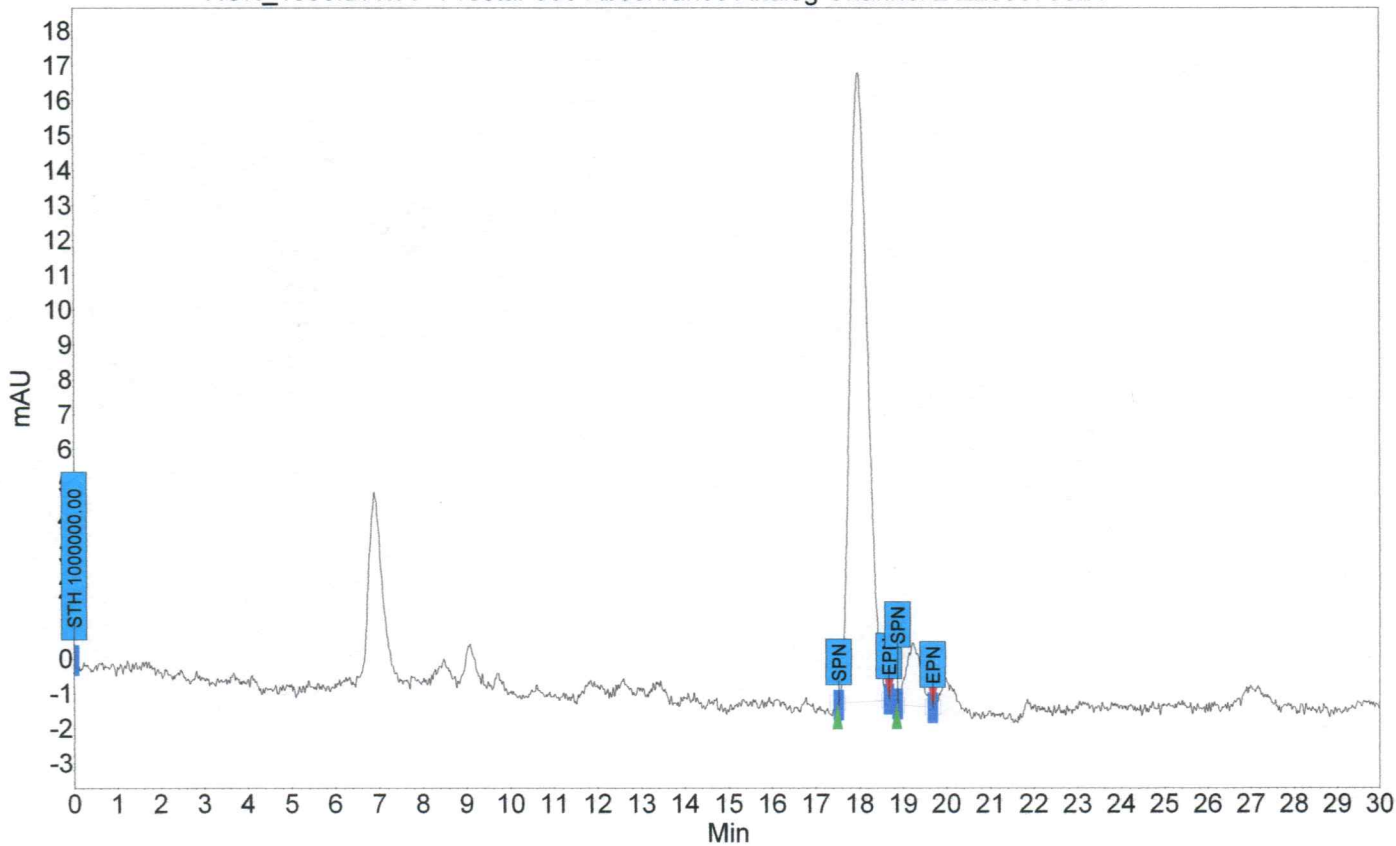

| Index | Name    | Time [Min] | Quantity [% Area] | Height [mAU] | Area [mAU.Min] | Area % [%] |
|-------|---------|------------|-------------------|--------------|----------------|------------|
| 1     | UNKNOWN | 17.97      | 92.40             | 18.1         | 8.4            | 92.402     |
| 2     | UNKNOWN | 19.24      | 7.60              | 1.8          | 0.7            | 7.598      |
| Total |         |            | 100.00            | 19.9         | 9.1            | 100.000    |

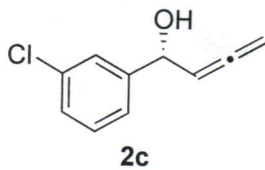

RUN\_1677.DATA - Prostar 335 Absorbance Analog Channel 1 EL05079024

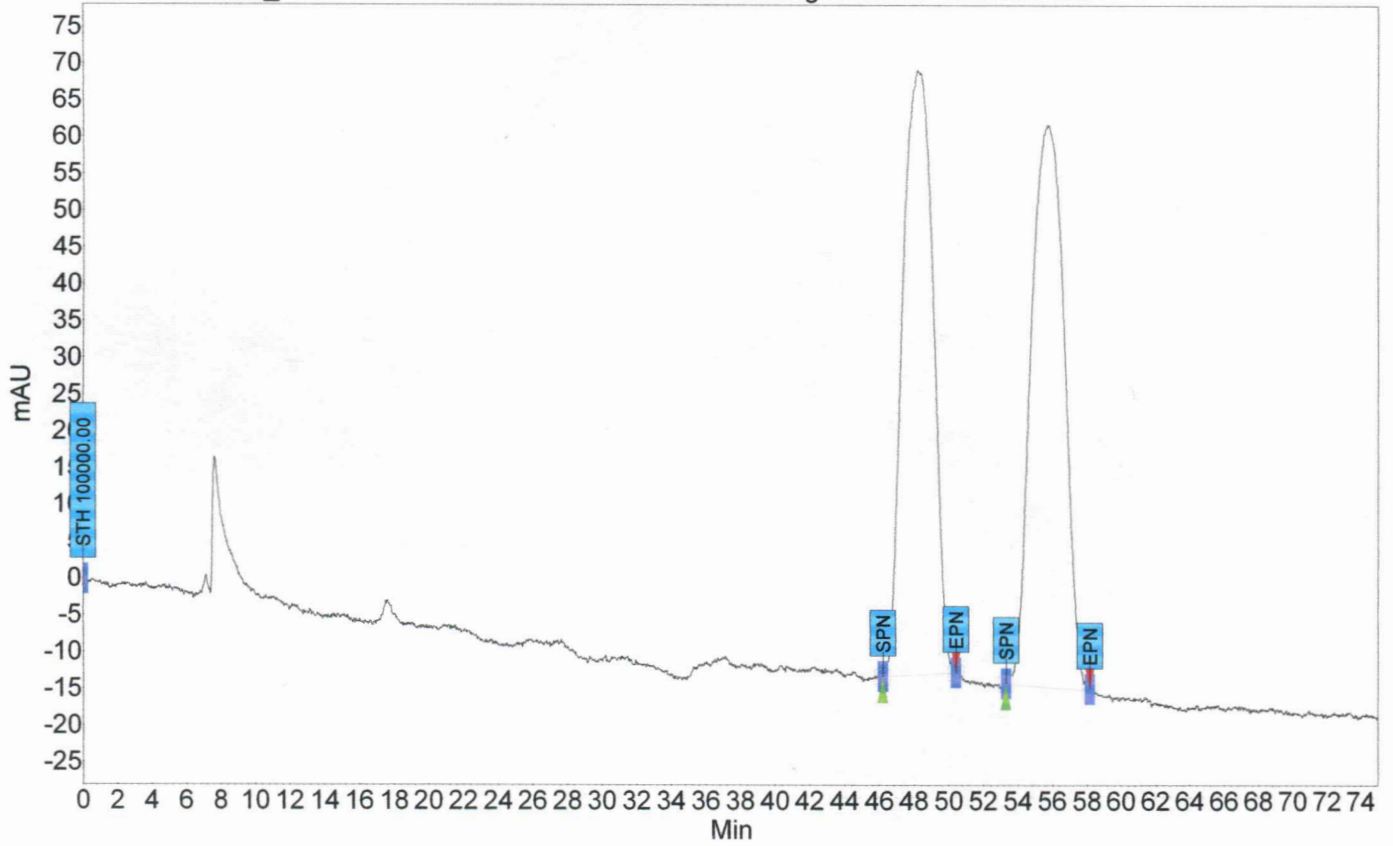

| Index | Name    | Time [Min] | Quantity [% Area] | Height [mAU] | Area [mAU.Min] | Area % [%] |
|-------|---------|------------|-------------------|--------------|----------------|------------|
| 1     | UNKNOWN | 48.25      | 49.68             | 82.1         | 167.0          | 49.681     |
| 2     | UNKNOWN | 55.76      | 50.32             | 76.6         | 169.2          | 50.319     |
| Total |         |            | 100.00            | 158.7        | 336.2          | 100.000    |

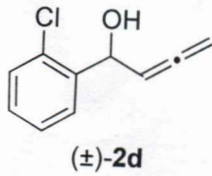

RUN\_1678.DATA - Prostar 335 Absorbance Analog Channel 1 EL05079024

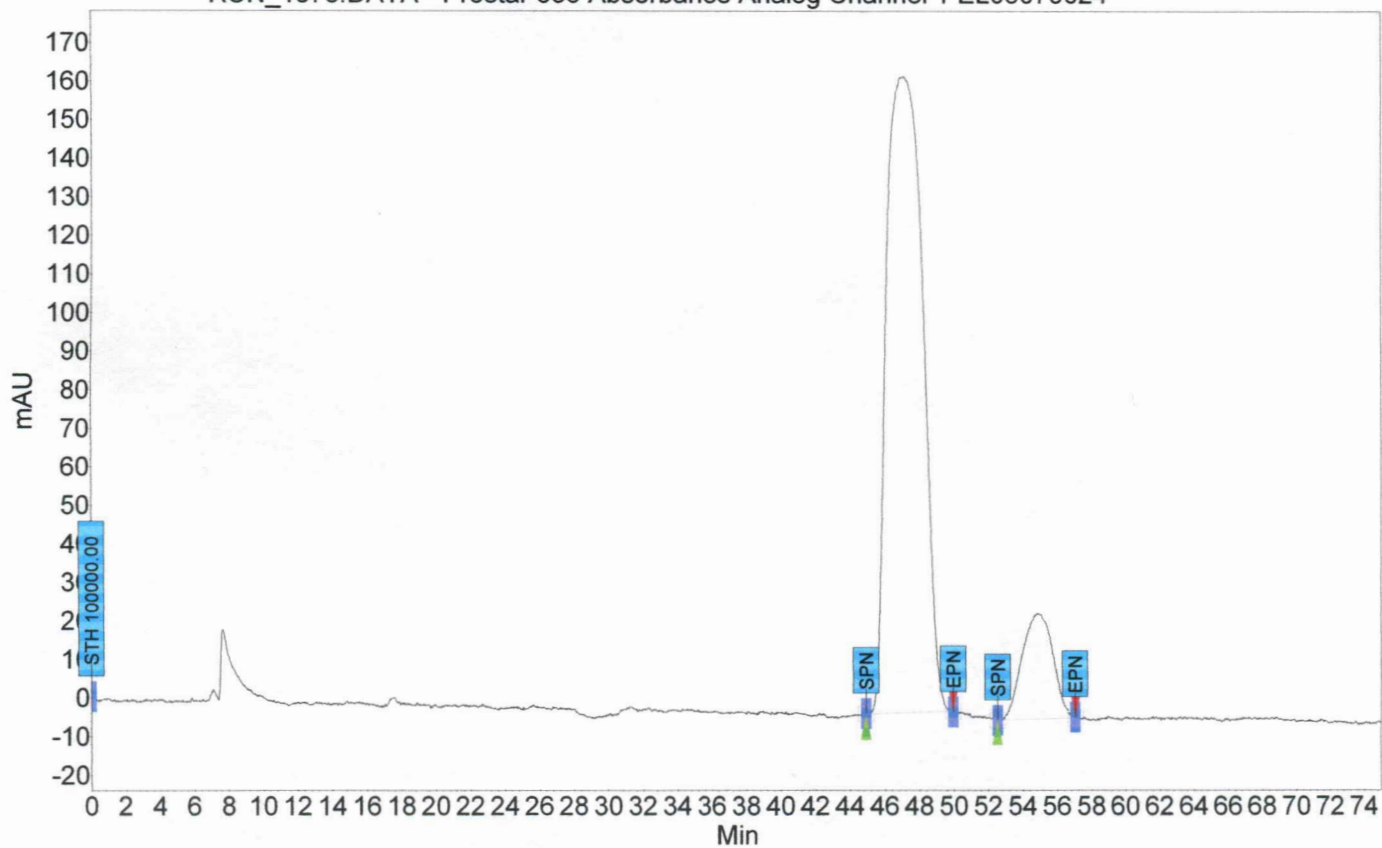

| Index | Name    | Time [Min] | Quantity [% Area] | Height [mAU] | Area [mAU.Min] | Area % [%] |
|-------|---------|------------|-------------------|--------------|----------------|------------|
| 1     | UNKNOWN | 47.17      | 87.56             | 165.3        | 400.8          | 87.560     |
| 2     | UNKNOWN | 54.93      | 12.44             | 27.3         | 56.9           | 12.440     |
| Total |         |            | 100.00            | 192.6        | 457.8          | 100.000    |

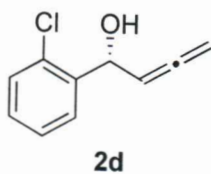

RUN\_1703.DATA - Prostar 335 Absorbance Analog Channel 1 EL05079024

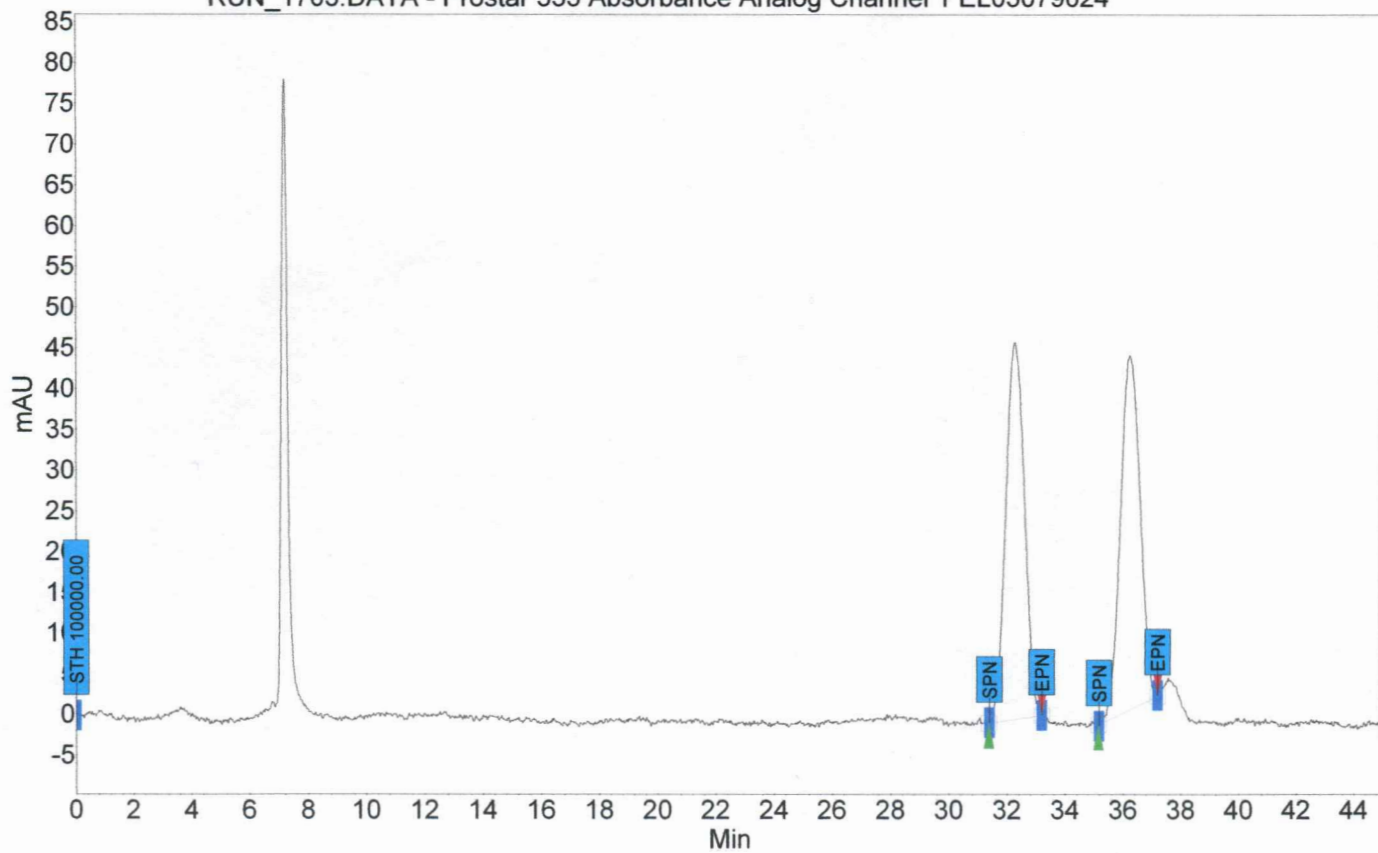

| Index | Name    | Time [Min] | Quantity [% Area] | Height [mAU] | Area [mAU.Min] | Area % [%] |
|-------|---------|------------|-------------------|--------------|----------------|------------|
| 1     | UNKNOWN | 32.28      | 50.24             | 46.3         | 34.4           | 50.237     |
| 2     | UNKNOWN | 36.23      | 49.76             | 43.4         | 34.1           | 49.763     |
| Total |         |            | 100.00            | 89.6         | 68.4           | 100.000    |

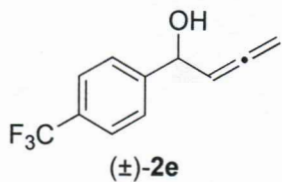

RUN\_1704.DATA - Prostar 335 Absorbance Analog Channel 2 EL05079024

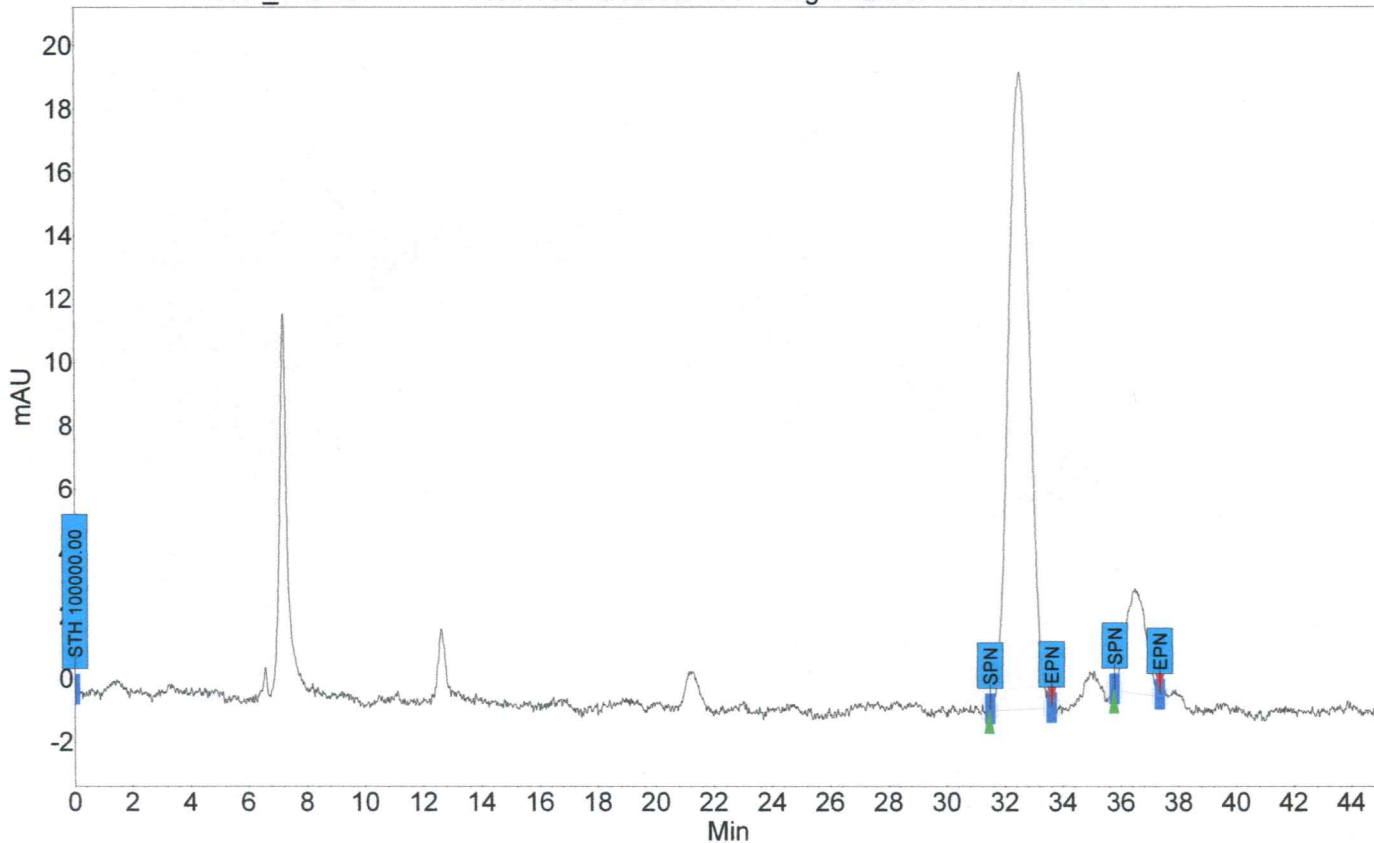

| Index | Name    | Time [Min] | Quantity [% Area] | Height [mAU] | Area [mAU.Min] | Area % [%] |
|-------|---------|------------|-------------------|--------------|----------------|------------|
| 1     | UNKNOWN | 32.49      | 86.54             | 20.1         | 16.9           | 86.540     |
| 2     | UNKNOWN | 36.47      | 13.46             | 3.3          | 2.6            | 13.460     |
| Total |         |            | 100.00            | 23.4         | 19.6           | 100.000    |

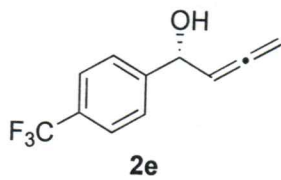

RUN\_1700.DATA - Prostar 335 Absorbance Analog Channel 1 EL05079024

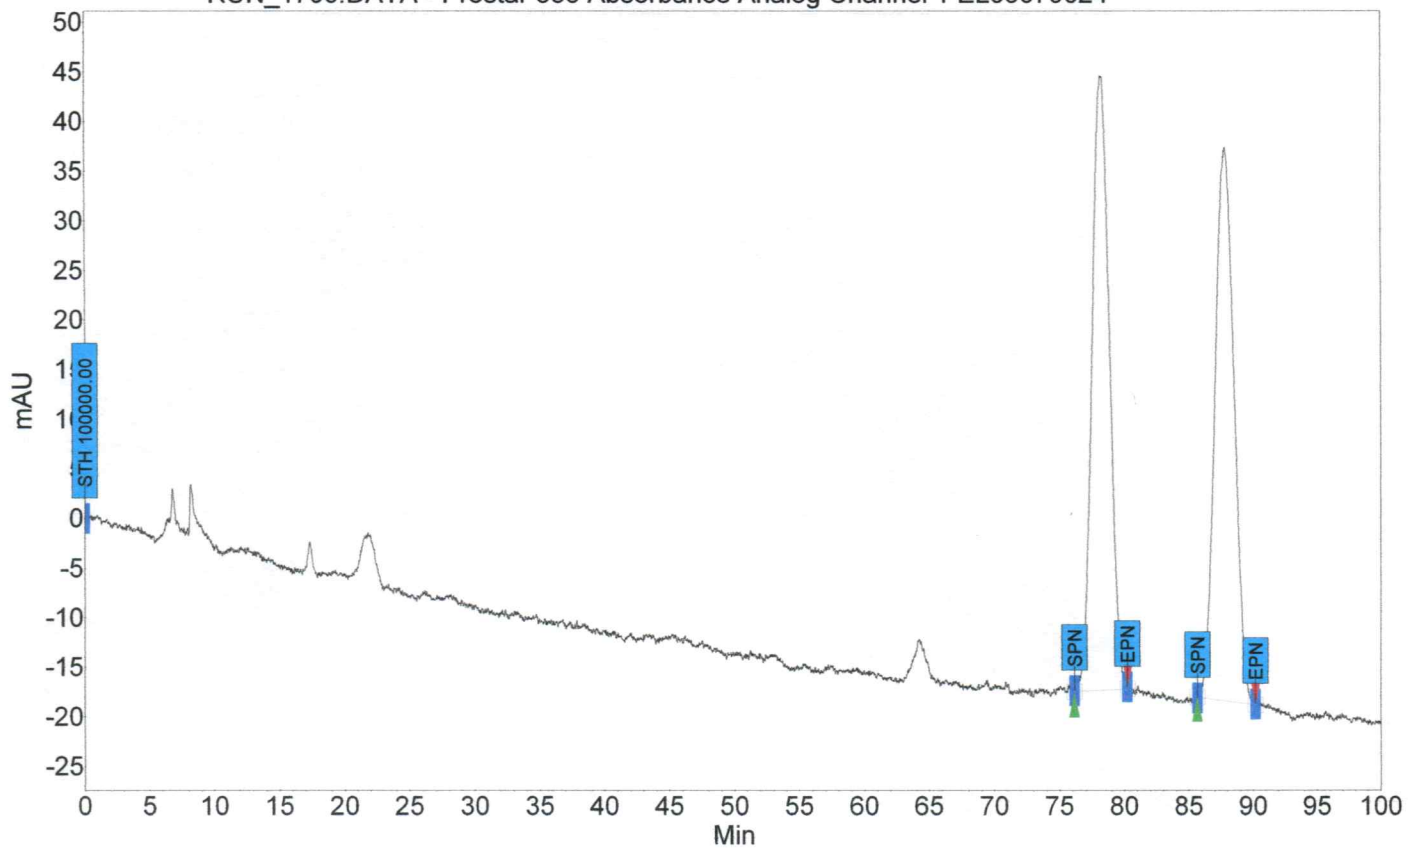

| Index | Name    | Time [Min] | Quantity [% Area] | Height [mAU] | Area [mAU.Min] | Area % [%] |
|-------|---------|------------|-------------------|--------------|----------------|------------|
| 1     | UNKNOWN | 78.16      | 50.15             | 61.9         | 96.2           | 50.155     |
| 2     | UNKNOWN | 87.80      | 49.85             | 55.6         | 95.6           | 49.845     |
| Total |         |            | 100.00            | 117.5        | 191.9          | 100.000    |

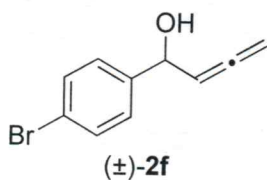



RUN\_1701.DATA - Prostar 335 Absorbance Analog Channel 1 EL05079024

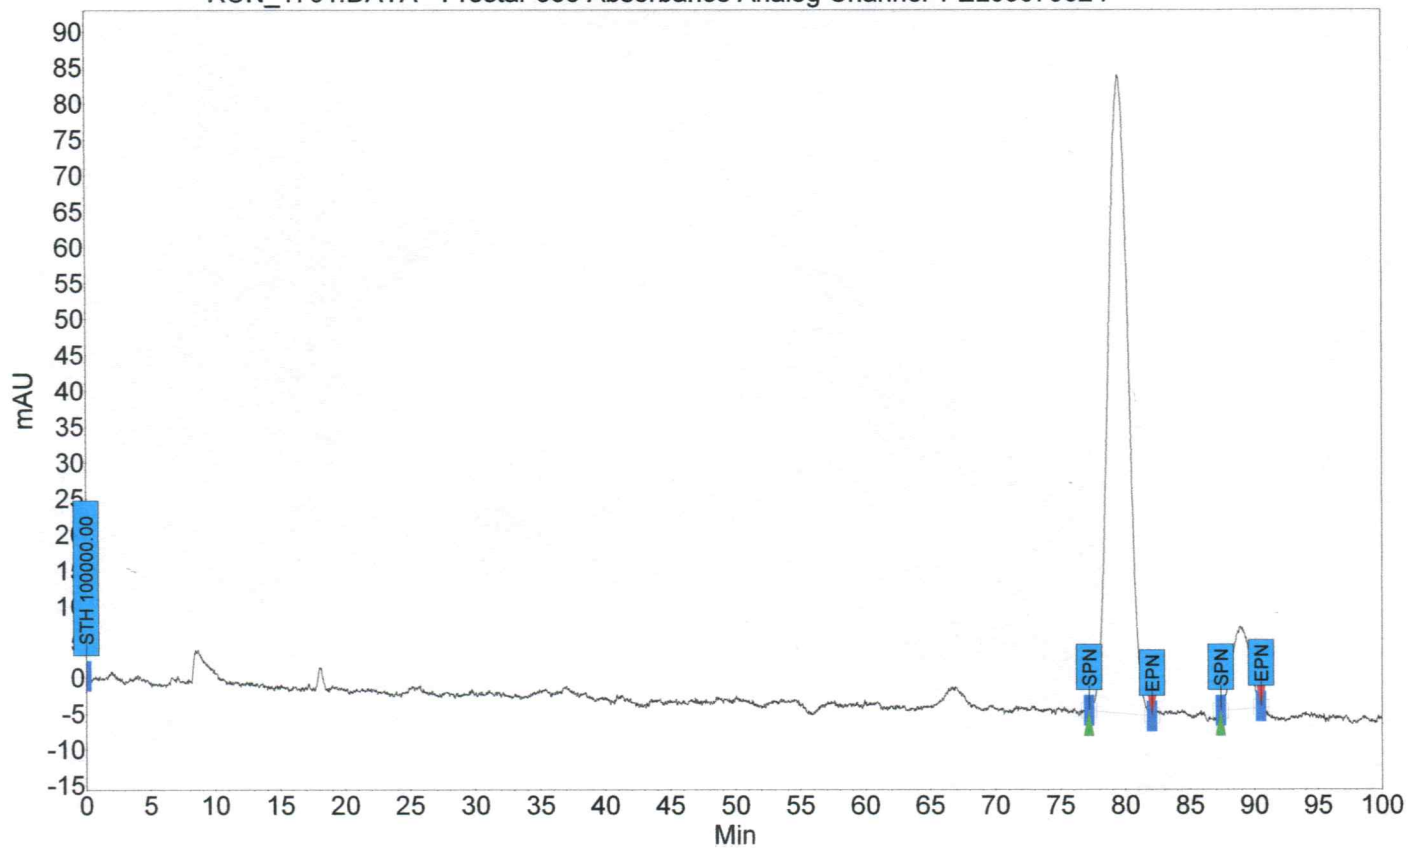

| Index | Name    | Time [Min] | Quantity [% Area] | Height [mAU] | Area [mAU.Min] | Area % [%] |
|-------|---------|------------|-------------------|--------------|----------------|------------|
| 1     | UNKNOWN | 79.45      | 89.49             | 88.9         | 157.9          | 89.492     |
| 2     | UNKNOWN | 88.88      | 10.51             | 11.4         | 18.5           | 10.508     |
| Total |         |            | 100.00            | 100.3        | 176.5          | 100.000    |

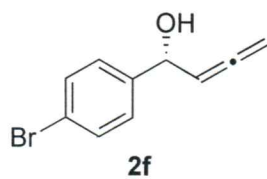



RUN\_1707.DATA - Prostar 335 Absorbance Analog Channel 1 EL05079024

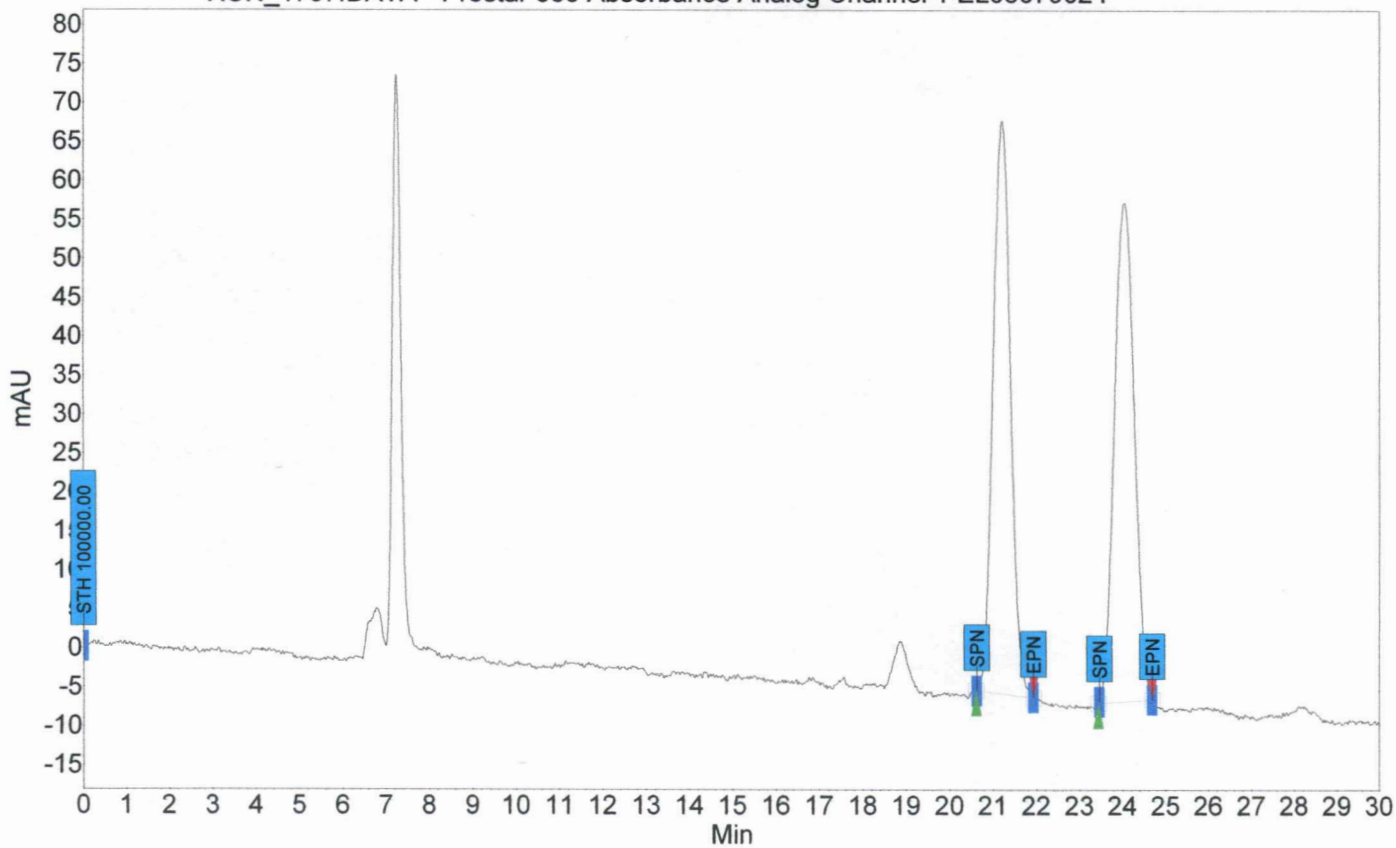

| Index | Name    | Time [Min] | Quantity [% Area] | Height [mAU] | Area [mAU.Min] | Area % [%] |
|-------|---------|------------|-------------------|--------------|----------------|------------|
| 1     | UNKNOWN | 21.20      | 49.89             | 73.5         | 34.2           | 49.888     |
| 2     | UNKNOWN | 24.03      | 50.11             | 64.0         | 34.3           | 50.112     |
| Total |         |            | 100.00            | 137.5        | 68.5           | 100.000    |

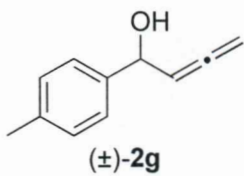

RUN\_1708.DATA - Prostar 335 Absorbance Analog Channel 1 EL05079024

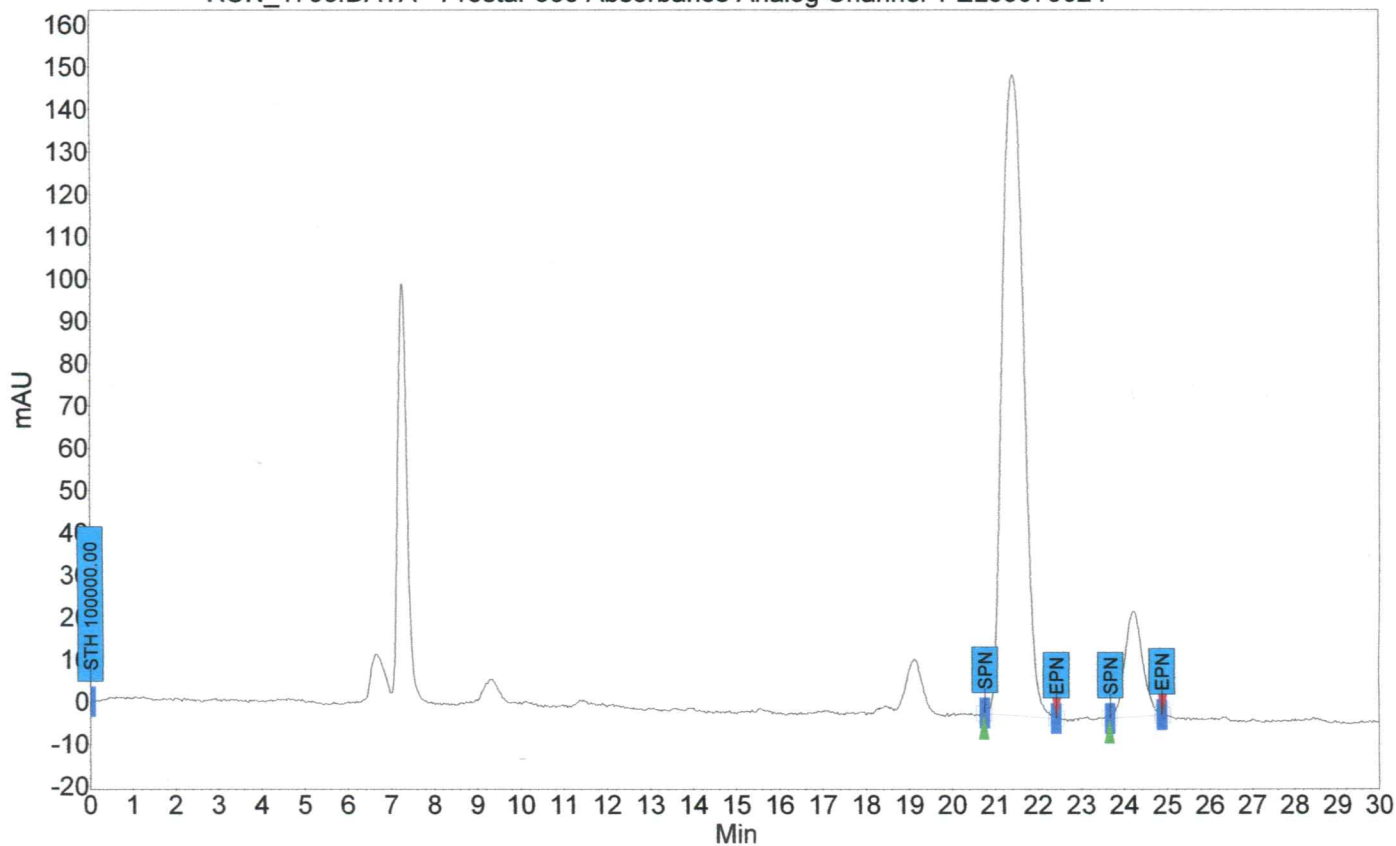

| Index | Name    | Time [Min] | Quantity [% Area] | Height [mAU] | Area [mAU.Min] | Area % [%] |
|-------|---------|------------|-------------------|--------------|----------------|------------|
| 1     | UNKNOWN | 21.41      | 87.94             | 151.5        | 87.8           | 87.937     |
| 2     | UNKNOWN | 24.21      | 12.06             | 25.1         | 12.0           | 12.063     |
| Total |         |            | 100.00            | 176.6        | 99.8           | 100.000    |

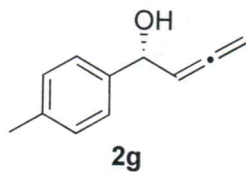

RUN\_1696.DATA - Prostar 335 Absorbance Analog Channel 2 EL05079024

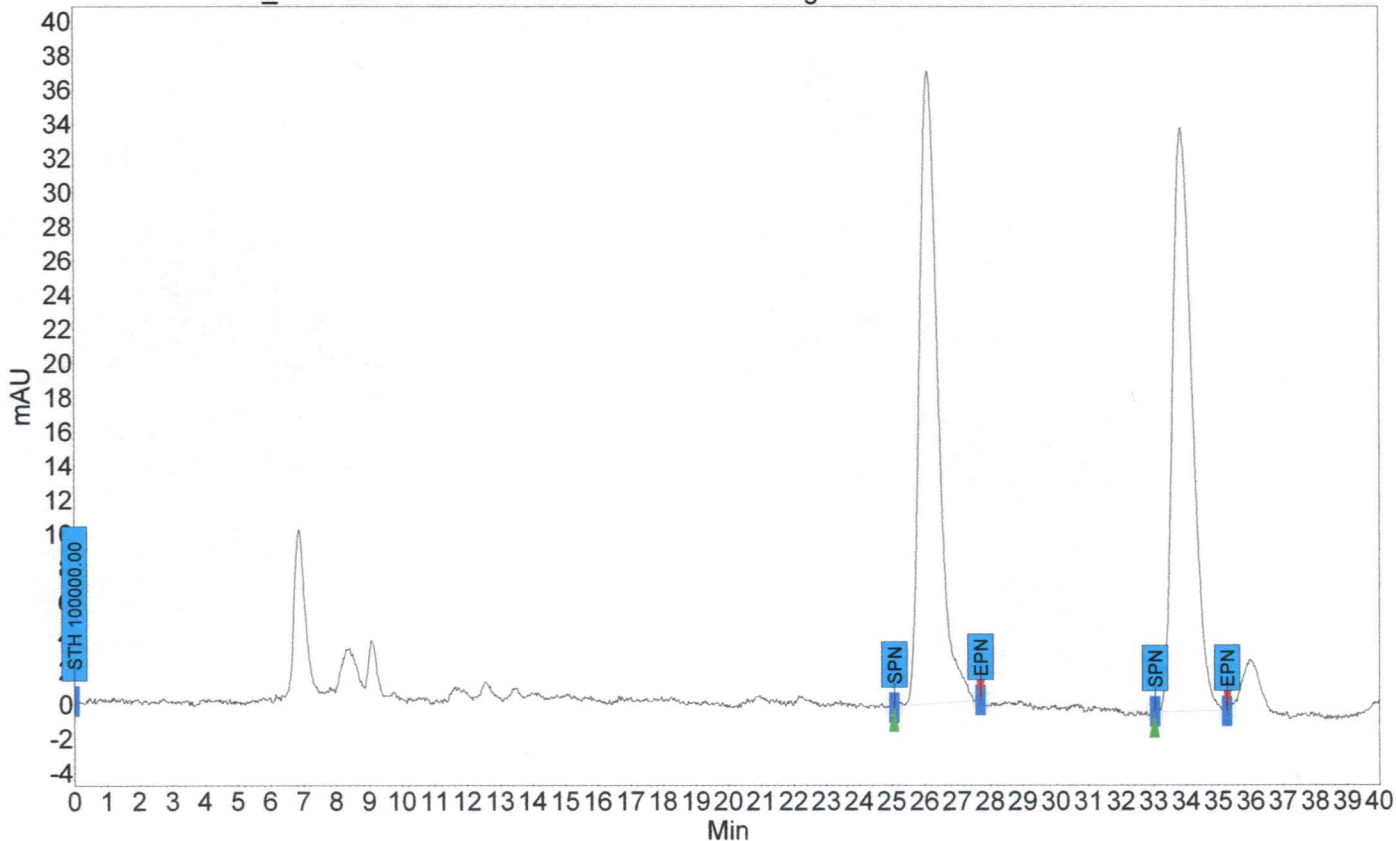

| Index | Name    | Time [Min] | Quantity [% Area] | Height [mAU] | Area [mAU.Min] | Area % [%] |
|-------|---------|------------|-------------------|--------------|----------------|------------|
| 1     | UNKNOWN | 26.08      | 50.32             | 37.1         | 24.2           | 50.322     |
| 2     | UNKNOWN | 33.85      | 49.68             | 34.2         | 23.9           | 49.678     |
| Total |         |            | 100.00            | 71.2         | 48.2           | 100.000    |

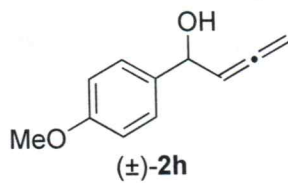

RUN\_1697.DATA - Prostar 335 Absorbance Analog Channel 2 EL05079024

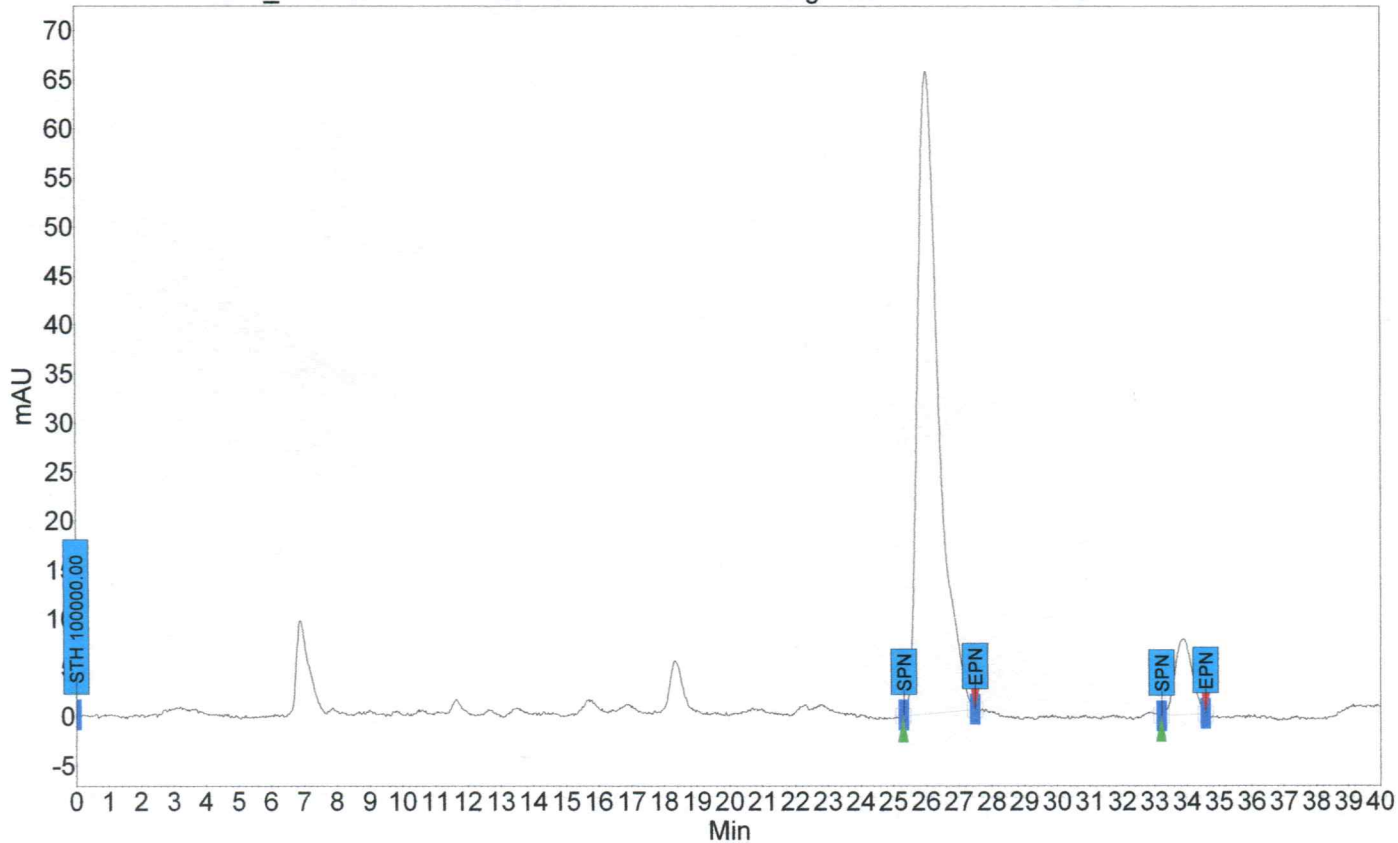

| Index | Name    | Time [Min] | Quantity [% Area] | Height [mAU] | Area [mAU.Min] | Area % [%] |
|-------|---------|------------|-------------------|--------------|----------------|------------|
| 1     | UNKNOWN | 26.00      | 91.09             | 65.7         | 49.0           | 91.093     |
| 2     | UNKNOWN | 33.88      | 8.91              | 7.8          | 4.8            | 8.907      |
| Total |         |            | 100.00            | 73.4         | 53.7           | 100.000    |

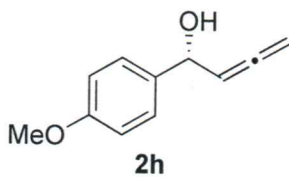

RUN\_1692.DATA - Prostar 335 Absorbance Analog Channel 1 EL05079024

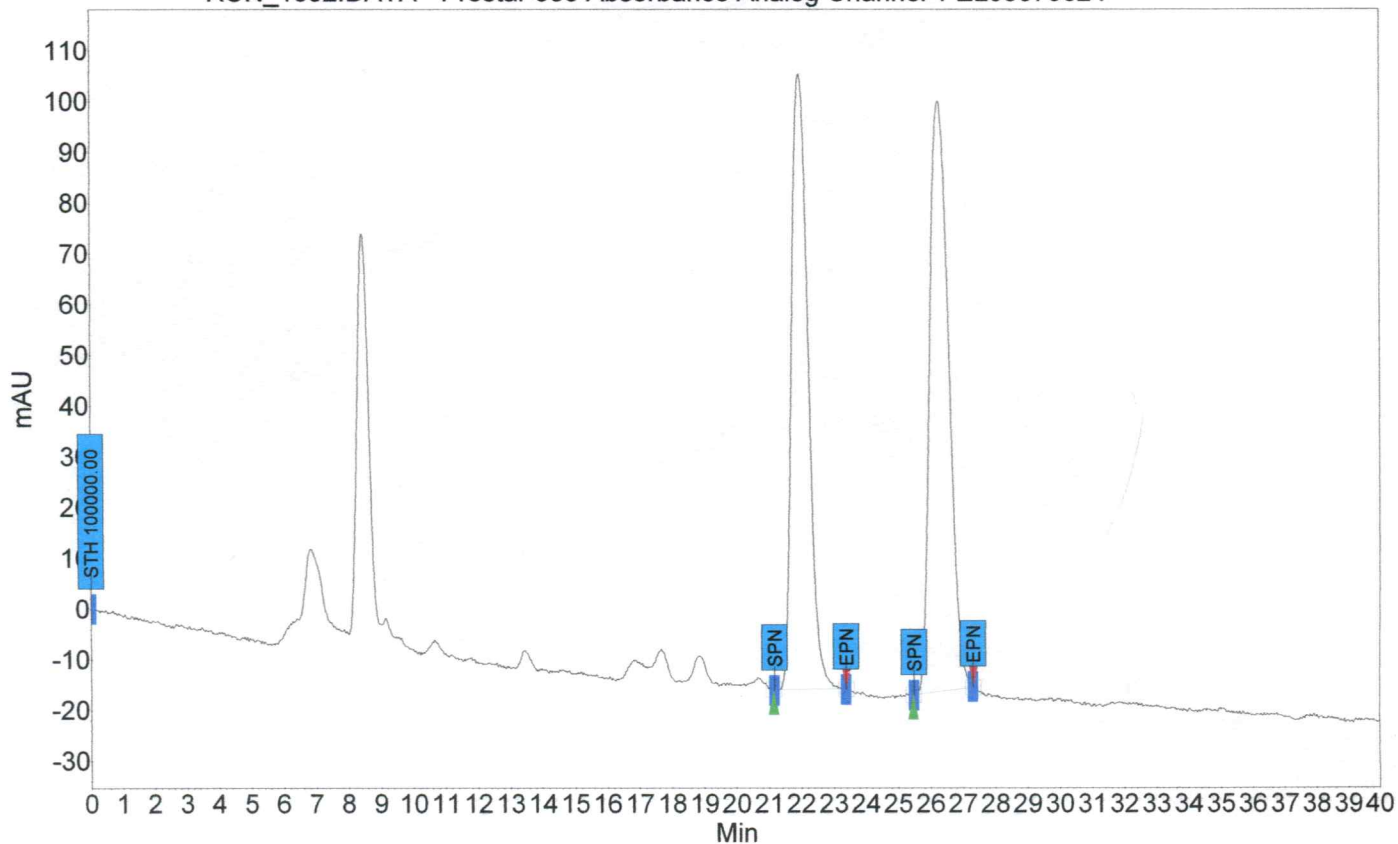

| Index | Name    | Time [Min] | Quantity [% Area] | Height [mAU] | Area [mAU.Min] | Area % [%] |
|-------|---------|------------|-------------------|--------------|----------------|------------|
| 1     | UNKNOWN | 21.92      | 47.55             | 121.3        | 71.7           | 47.546     |
| 2     | UNKNOWN | 26.23      | 52.45             | 116.4        | 79.1           | 52.454     |
| Total |         |            | 100.00            | 237.7        | 150.8          | 100.000    |

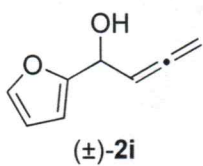

RUN\_1693.DATA - Prostar 335 Absorbance Analog Channel 1 EL05079024

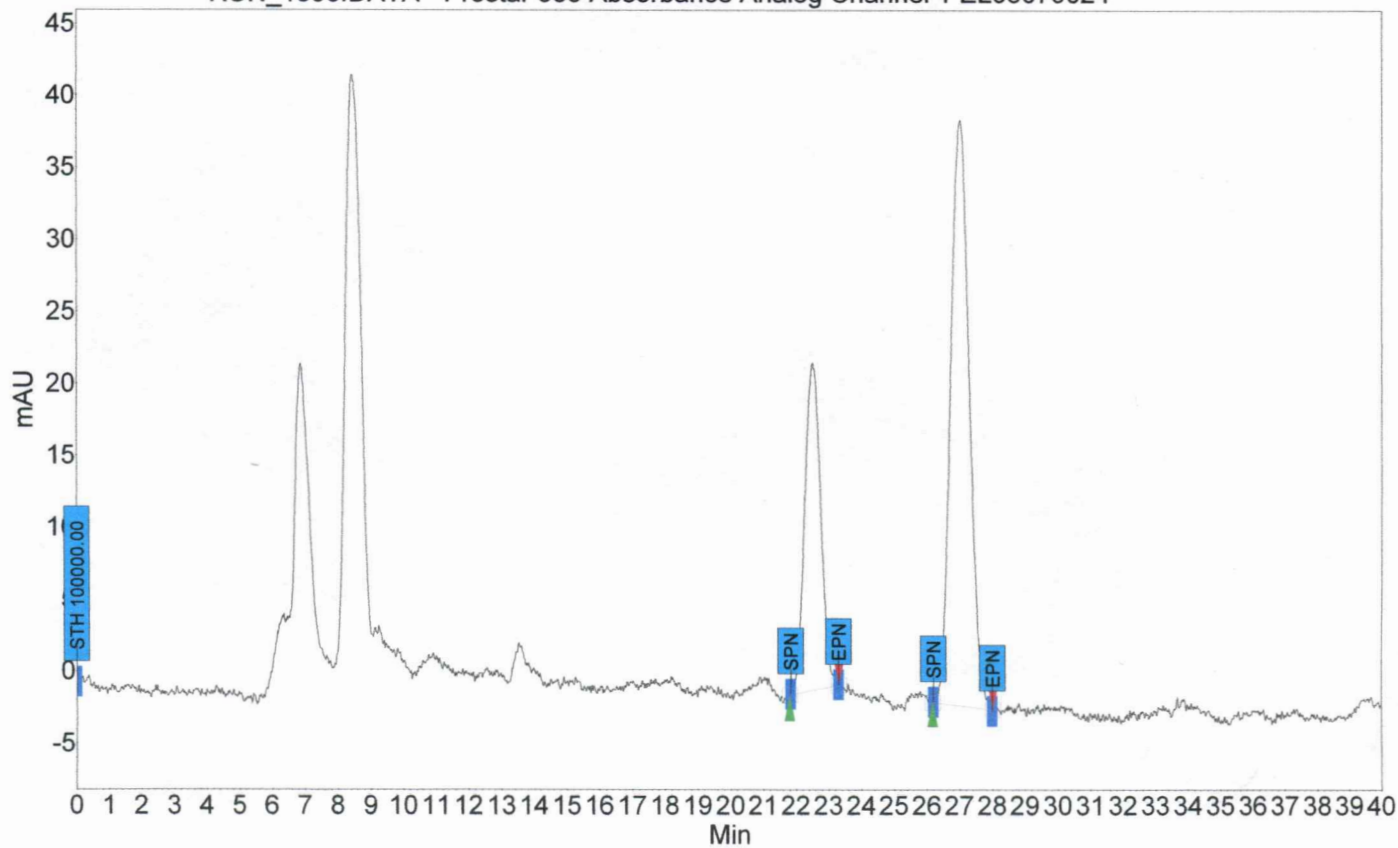

| Index | Name    | Time [Min] | Quantity [% Area] | Height [mAU] | Area [mAU.Min] | Area % [%] |
|-------|---------|------------|-------------------|--------------|----------------|------------|
| 1     | UNKNOWN | 22.49      | 32.47             | 22.8         | 12.9           | 32.468     |
| 2     | UNKNOWN | 27.00      | 67.53             | 40.7         | 26.8           | 67.532     |
| Total |         |            | 100.00            | 63.4         | 39.6           | 100.000    |

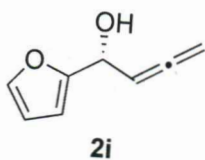

RUN\_1711.DATA - Prostar 335 Absorbance Analog Channel 1 EL05079024

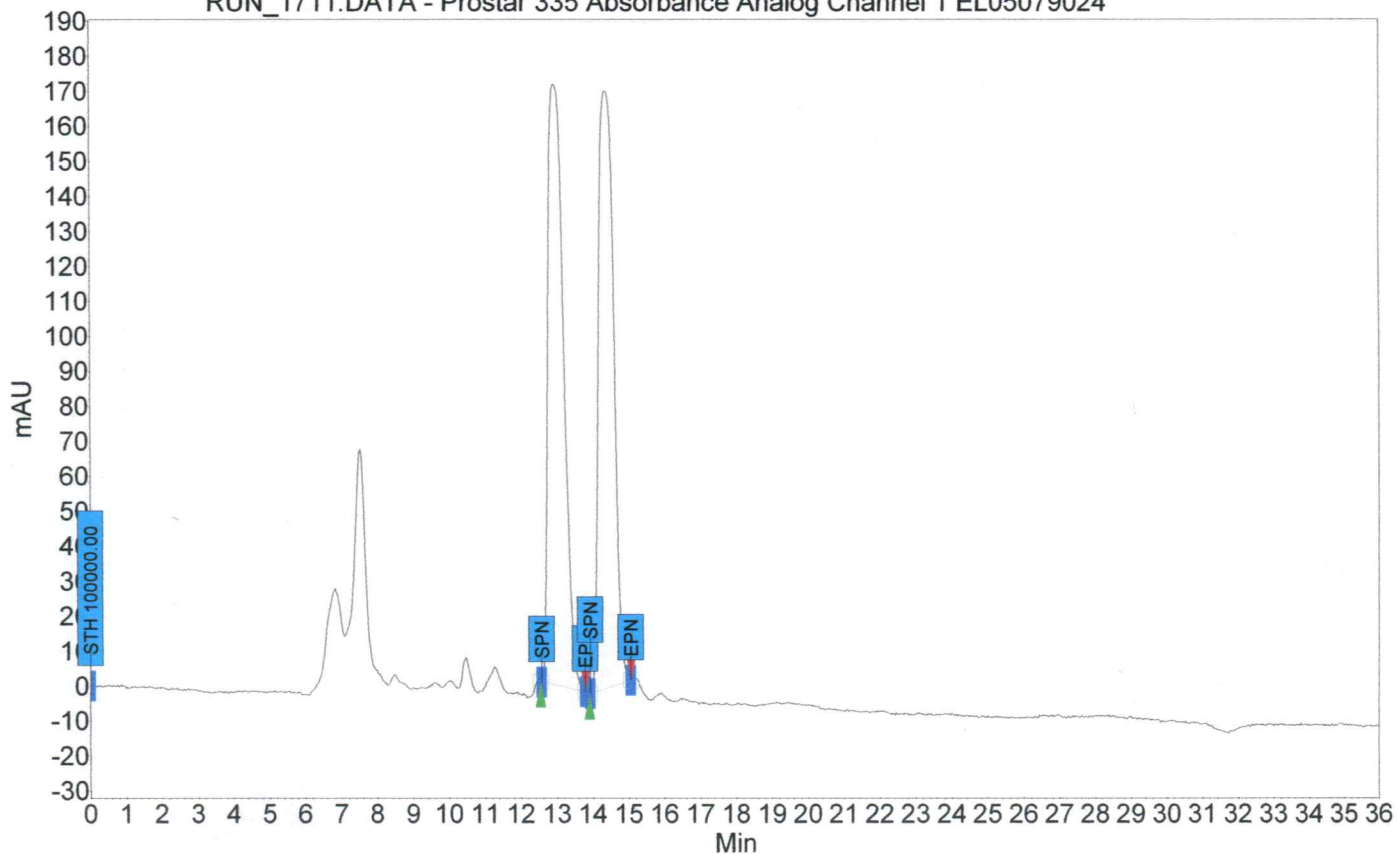

| Index | Name    | Time [Min] | Quantity [% Area] | Height [mAU] | Area [mAU.Min] | Area % [%] |
|-------|---------|------------|-------------------|--------------|----------------|------------|
| 1     | UNKNOWN | 12.93      | 50.86             | 171.7        | 86.4           | 50.861     |
| 2     | UNKNOWN | 14.33      | 49.14             | 170.9        | 83.5           | 49.139     |
| Total |         |            | 100.00            | 342.5        | 169.9          | 100.000    |

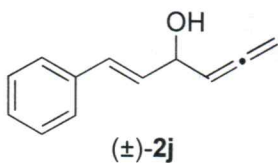



RUN\_1713.DATA - Prostar 335 Absorbance Analog Channel 1 EL05079024

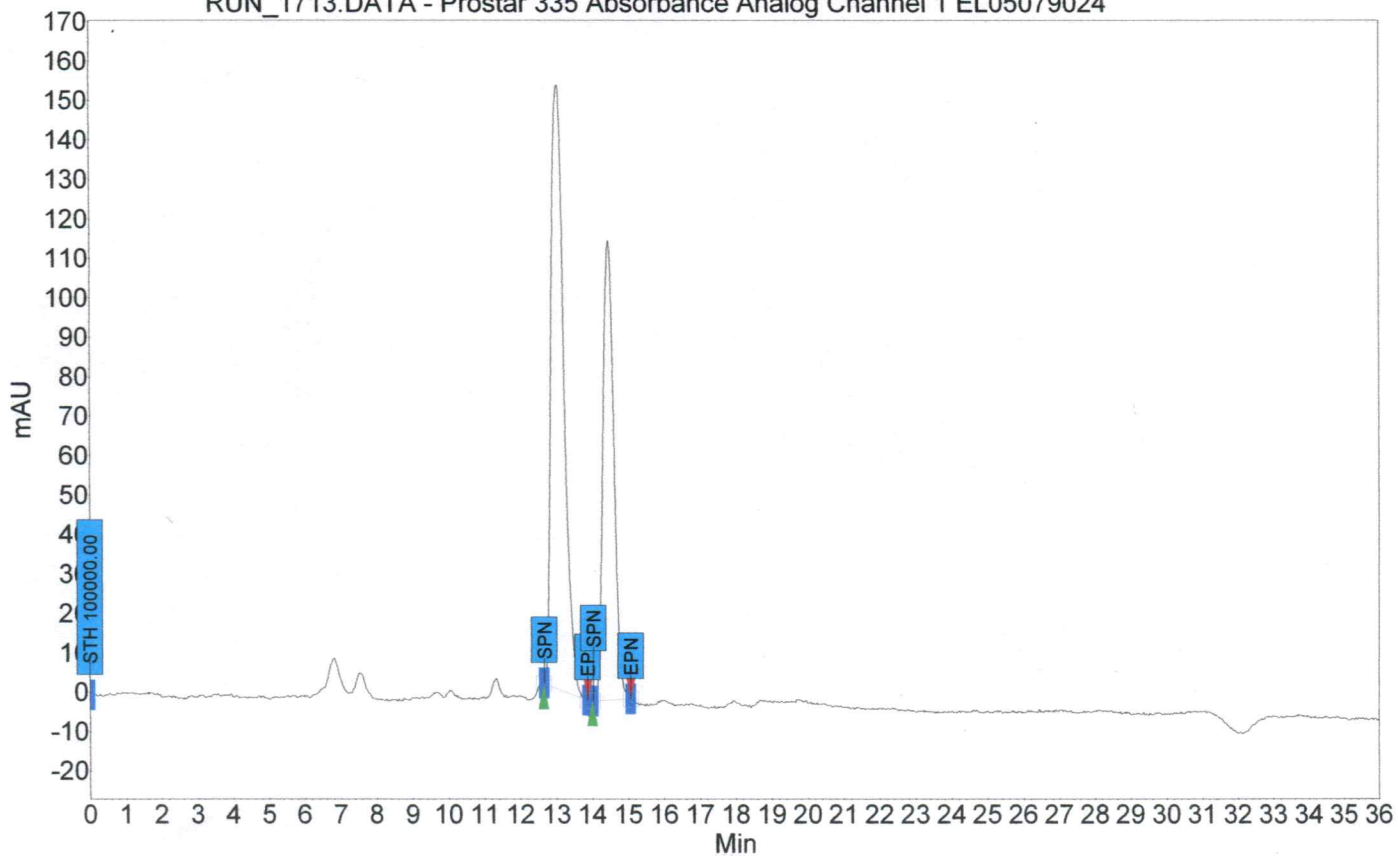

| Index | Name    | Time [Min] | Quantity [% Area] | Height [mAU] | Area [mAU.Min] | Area % [%] |
|-------|---------|------------|-------------------|--------------|----------------|------------|
| 1     | UNKNOWN | 13.03      | 60.65             | 153.1        | 62.9           | 60.653     |
| 2     | UNKNOWN | 14.45      | 39.35             | 116.6        | 40.8           | 39.347     |
| Total |         |            | 100.00            | 269.7        | 103.7          | 100.000    |

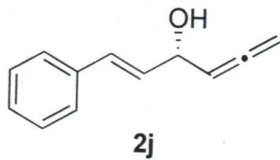



RUN\_1686.DATA - Prostar 335 Absorbance Analog Channel 1 EL05079024

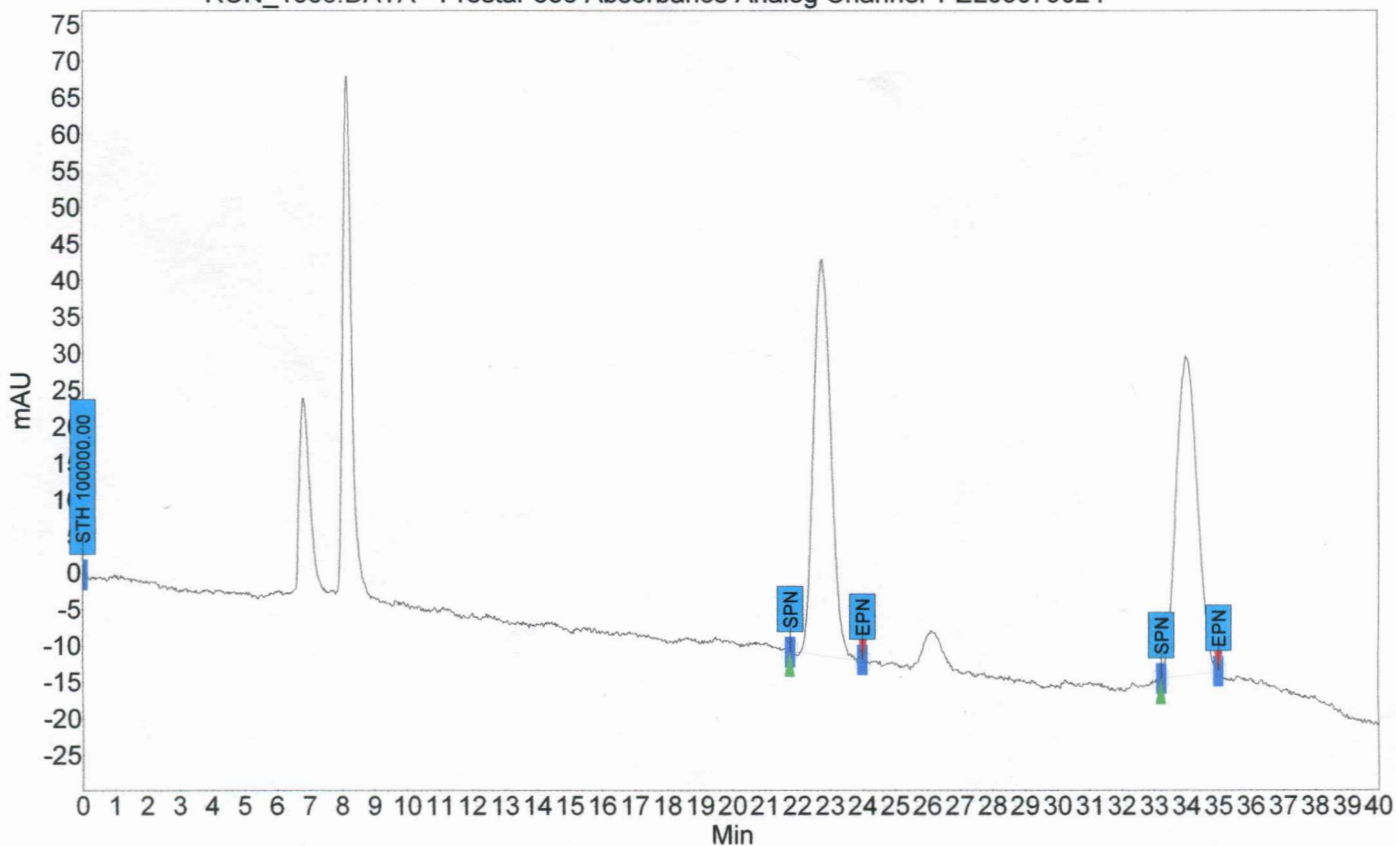

| Index | Name    | Time [Min] | Quantity [% Area] | Height [mAU] | Area [mAU.Min] | Area % [%] |
|-------|---------|------------|-------------------|--------------|----------------|------------|
| 1     | UNKNOWN | 22.76      | 50.04             | 54.3         | 33.4           | 50.041     |
| 2     | UNKNOWN | 33.99      | 49.96             | 43.7         | 33.3           | 49.959     |
| Total |         |            | 100.00            | 98.0         | 66.7           | 100.000    |

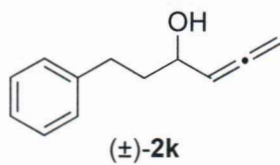

RUN\_1687.DATA - Prostar 335 Absorbance Analog Channel 1 EL05079024

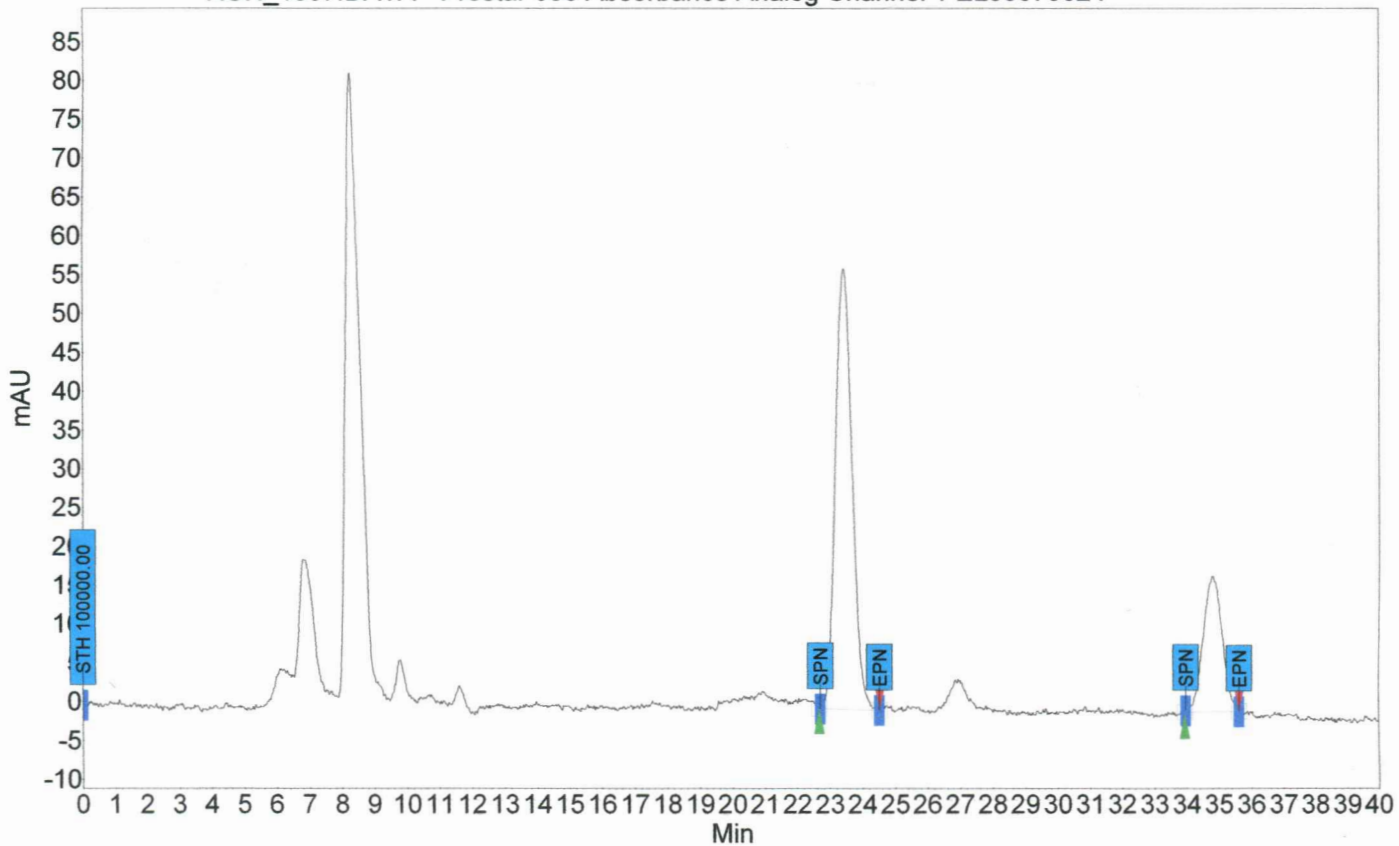

| Index | Name    | Time [Min] | Quantity [% Area] | Height [mAU] | Area [mAU.Min] | Area % [%] |
|-------|---------|------------|-------------------|--------------|----------------|------------|
| 1     | UNKNOWN | 23.40      | 73.88             | 56.7         | 33.7           | 73.875     |
| 2     | UNKNOWN | 34.79      | 26.12             | 17.3         | 11.9           | 26.125     |
| Total |         |            | 100.00            | 74.1         | 45.7           | 100.000    |

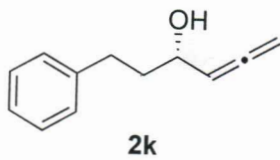

Supplement: Beilstein_J_Org_Chem-20-3069-s001.pdf [file Beilstein_J_Org_Chem-20-3069-s001.pdf]
